# Supplementary material for: Interrelation between Stress Management and Secretion Systems of Ralstonia solanacearum: An In Silico Assessment
Source: MDPI journal article supplement (doi:10.3390/pathogens11070730), 2022-06-27
Supplement: s1 [file s1]

**Table S1.** Secondary data set for stress responsive enzymes and factors of *R. solanacearum* using KO orthologs.

| Sl. No. | Enzyme/Name                                                  | Coded by | KO No. | Quarry Sequence from<br><i>Ralstonia solanacearum</i> strain GMI1000                                                                                                                                                                                                                                                                                                                                                                                                                                                                                                                                                                                                                                                                                                                                                     |
|---------|--------------------------------------------------------------|----------|--------|--------------------------------------------------------------------------------------------------------------------------------------------------------------------------------------------------------------------------------------------------------------------------------------------------------------------------------------------------------------------------------------------------------------------------------------------------------------------------------------------------------------------------------------------------------------------------------------------------------------------------------------------------------------------------------------------------------------------------------------------------------------------------------------------------------------------------|
| 1       | Catalase                                                     | katE     | K03781 | MSFPSRLRVSLALAAALTAFAHAGAVTLTRDNGAPVGDNQNSQTAGPNGPVLLQDV<br>QLIQKLQRFDRERIPERVVHARGTGAHGTVFVASKDISDLTRAKVFTPGEEPVFVRFS<br>SVIHSGHSPETLRDPRGFATKFYTREGNWDLVGNLNPVFFIRDAMKFPDMVHSLKPS<br>PDSNVQDPNRFDFFSHQPESTHMLTRVYTDYGTPTSIREMDGNSVHAYKFVNAKG<br>EVHYVKFWKSLQGGKGLSAKEVEAIQGGKDFNHMTRDLIANIDKGNYPKWDLYIQ<br>VLKPEQLAKDFDPLDATKVWPDVPEVKVGTMTLNKNPENVFQETEAALAPSNLV<br>PGIEPSEDRLQGRIFSYADTQLYRVGTNGLQLPVNRPRTSAANYNQDGLNAGARK<br>GSVNYQPSAHADLSDAATVKYSQLPVSGTTQQQRIARTQNFKAQAGDYRSLTAKEQ<br>ANLVSNLAGDLGQVKDDGVKYTMLSYFQKADAGYGRALAAQAVKADPARVESLAA<br>KLQD                                                                                                                                                                                                                                                            |
| 2       | Catalase                                                     | katG     | K03782 | MGPEPEAAGIEEQGLGWSSRFGTGKGTDAITSGLEVTWTTPTQWSNNFFQNLFGE<br>WELTKSPAGAHQWVAKDAAETIPDAHDPKSAKHLPTMLTTDLRLDFPAYEKISRRFY<br>EHPEQFADAFARAWFKLTHRDMGPRARYLGPVPAEALIWQDPIPAVDHKLIDTQDI<br>AALKARILASGLSVSQLVSTAWASASTFRGSDMRGGANGARIRLAPQKDWANQPA<br>QLAKVLETLESIQGAFFGAQSGGKKVSLADLIVLAGCAGVEQAANKAGHAEVFPFT<br>PGRMDAAQAQTDVESFAVLEPIADGFRNYQKGYTLPAEALLVDKAQLLTAPEM<br>TVLVGGLRVLDTNIGQTRHGVFTQRPESLTNDFVNLDMGTVEWDRKDRDVFEGR<br>DRATGALKWTGTRVDLVFGSHSQLRALAEVYGSADAQAKFVRDFVAWWDKVMNL<br>DRFDLA                                                                                                                                                                                                                                                                                                                           |
| 3       | Nitric-oxide reductase                                       | norB     | K04561 | MNTNHLRWRLGLIFVLSFGALGYLGRQIYLAAPPQAVVTTAGDVLFTGEQIQRG<br>QQAWLAAGGQQLGTWVGHGSYVAPDWSADWLHREATALQAIHTQQQFSAASLT<br>AAQQAADVTVTKKEEMRRNTYDAARDSITVSKERARAIHGVQAQHFALFGTDPSLAT<br>LRDQYAMATGALPDQADREALAAFFFWTSWAAATDRPGETDVSYSNWPHEPLVG<br>NTMTSDAAMWSMVSIILLAGIAAMLWLHGSGKHEEDAKPLPADPFLNVVATPSMK<br>ATRYFFAVIGLILVQIGMGAITAHYAVEGEAFFGIPLAQVLPYVISRTVHTQLGLVL<br>IATAWLATGLYIAPLLSGREPQFKLGVDLFWALIFIVVGSIAATGWLTGLQHRGADF<br>GFWIGNQGLEYSMGRVWQLLLFVGLFWVALLGRALWPALKTPSESRLIAMVFL<br>SATCIGGFYSTSLVWQHTHYSMIEYWRWWLVHLWVEGFVEVFATAVVALLFTL<br>GLVRAASANRAIVAEIVFLFGGILGLTHHLIFTGTPTSISVGAVFSALEVVPLTLIGL<br>EALQTYRRMRGTPWLGAYKWPVLCFVAVGFVWNTVAGGLGFAINPPASLYYVQGL<br>NMTAAHGHAAALFGVYGMGLGIGLMLFCLRGYARSLHADRLKPAYWGLNIGLAM<br>MVFMSLLPAGIYQAWASITKGMWYARSPEVHVKLMETLVWLRVPGDIVFAGGAFI<br>LALYALRLRRPPSRQAATAPATATR |
| 4       | Superoxide dismutase                                         | sodB     | K04564 | MAHTLPPLPYALDALPHISKETLEFHYGKHHQTYVTNLNNLIPGTEFENLSLEDIVK<br>KSSGGLFNNAQVWNHTFYWNLKPNGGGAPAGALADAINAKWGSFDFKKEEFTK<br>VAIGTFSGWAWLVKKADGSLDLVSTNAATPLTTDAKPLLTCDVWEHAYYIDYRN<br>ARPKYVEAFWSLVNWDVFNFA                                                                                                                                                                                                                                                                                                                                                                                                                                                                                                                                                                                                                    |
| 5       | Superoxide dismutase                                         | sodC     | K04565 | MKQLVIGLAAIGLMAGCASNAGTGASTGAPAAAGTSALATLAPKSGSNVQGTIKLLQ<br>QGDSRVAMAVDIAGLPPNGMFGFHVHEKGDCSSPDGMSAGGHFNPTGQPHGDPRS<br>GPHHAGDIPMLQSDASGKAVGSIVLNGVTLTPGATSLVGRAVIVHAGMDDYKTQPT<br>GNSGGRVACGVIVAN                                                                                                                                                                                                                                                                                                                                                                                                                                                                                                                                                                                                                      |
| 6       | Hydrogen peroxide-inducible genes activator                  | oxyR     | K04761 | MIAMTLTELKYIVAVARERHFGRAAEACFVSQPTLSVAIKKLEDELAVQIFERGASEV<br>SVTPVGEQIVTQAQHVLEQTMAIREIAKQGMPLAGPLRLGVITYTIGPYLLPALVKQ<br>MIDTVPQMPLMLQENFTARVELLKQGEIDCAIMAEPFPEAGLMTVPLYDEPFVAV<br>PRGHALAGSSAVDPEALKQQTMLLLGNGHCFRDHVLNVCPELSRFSQADGIQKTF<br>EGSSLETIRHMASVGITVLPRTSVVPMQPAADLLAYVPFQEPVDRRVVLAWRKS<br>FTRVAAIEAVAKAVACSLPGIKPLPVTPLVH                                                                                                                                                                                                                                                                                                                                                                                                                                                                               |
| 7       | dnak suppressor protein                                      | dksA     | K06204 | MSSKKLLEAEILKMGDKDYMNQAQLAFFKDRLEKLRDDILKNAGQTTEHLRETVI<br>VPDPADRATIEEEHALELRTRDRERKLLKKVEQSIARIDEGNYGYCDETGEPIGIPRL<br>ARPTATLLEAQERREKQKLFGD                                                                                                                                                                                                                                                                                                                                                                                                                                                                                                                                                                                                                                                                          |
| 8       | nitric oxide-sensitive transcriptional repressor             | nsrR     | K13771 | MRLTDYTDYSLRTLIYVAVHPDVLVTIQIADAFGIPKNHLLIKIVQGLGQNGFLAHTVR<br>GAGTYTLGRPAVEINIGDVVRATEPDSFSLVECFVNLNATRTLKKNDEEITLTTEGFSVLK<br>AYFEVLDITYTLQDLIERPAALNRVLAEGVAVPMPQSGKGRTPKAAPAAGSRTKSG                                                                                                                                                                                                                                                                                                                                                                                                                                                                                                                                                                                                                                 |
| 9       | dissimilatory nitrate respiration regulator                  | DNR      | K21563 | MHETRDIGDLLKHSPLFEGLDAEDLATLARDSHQIRLARHDFVFHRGDCADGFYVV<br>AVGTIKLVLPAGHGHNVIEFFGPGEYFGEFPMFLNQPHAADAQALEDSSLIRIGKPTI<br>DAALDIHPTLARRMLTGLSSRLHTLMCDIETVNLQSASQRLIGYLLMLPRKLDRARFP<br>CSKTLVASKLGLAPATLSRVLQQLIRDGLILVEGRDVVHSAAALQRLRAG                                                                                                                                                                                                                                                                                                                                                                                                                                                                                                                                                                               |
| 10      | oxidative stress resistance two-component response regulator | ompR     | K07659 | MENSGHKILVDDDDPRLRDLRLRYLGEQGTVLVAENATAMNKLWLRRERFDLLVL<br>DLMMPGEDGLSICRRLRGANDQTPHIMLTAKGEDVDRIVGLEMAGDDYLPKPFNP<br>LIARIHVLRRRGPAEIPGAPSETPETFAFGDFVLNLAATRLKKNDEEITLTTEGFSVLK<br>VFARHPRQPLSREKLMEMARGREYEVFDRSLDVQISRLRKLIEPDASNPRFIQTVWGL<br>GYVFIPDGAK                                                                                                                                                                                                                                                                                                                                                                                                                                                                                                                                                            |
| 11      | two-component response regulator                             | baeR     | K07664 | MILIVEDEPKLAALMADYLRAAHYETEWDGTRAVQVRVRETSPELVLLDMLPGK<br>DGLEICREVRAFSDLPVMTARVEEIDRLGLGELGADDYICKPFSRELVARIKTILR<br>RVQRSGAQSDSLLQIDNTAYSATLRGQRLDTPVEFRLLSALANAPGRILSRANLLEQ<br>IYDDHRVVDTRVDTHVKNLRRKMELVSPGTIELHSVYGVGYRLDA                                                                                                                                                                                                                                                                                                                                                                                                                                                                                                                                                                                         |
| 12      | Histidine kinase                                             | baeS     | K07642 | MRLSFGITSKLFAALFALSVMVVALAMGAARVWFDTNFDYVNNAREAMAVFAQ<br>SIESVYAEHGNWGVLRNDRQAWYRLIRREIGRTHAGPFGGPRGDAEPVPPFAPPPGD<br>VPPGGLPPPPDAGDRPPQHPPEGPGMHPIWLLDAGRVPVIGDGPVPGSGQWHL<br>HHNGQTVGWLATPQRMHVPEGADQAFQAQLRATWIIAALSVLLAAGVAAILLARG                                                                                                                                                                                                                                                                                                                                                                                                                                                                                                                                                                                   |

|    |                                            |             |        |                                                                                                                                                                                                                                                                                                                                                                                                                                                                                                                                                                                                                                                                                                                                                                                                                                                                                                                                                                                                                                                                                                                                                                                                  |
|----|--------------------------------------------|-------------|--------|--------------------------------------------------------------------------------------------------------------------------------------------------------------------------------------------------------------------------------------------------------------------------------------------------------------------------------------------------------------------------------------------------------------------------------------------------------------------------------------------------------------------------------------------------------------------------------------------------------------------------------------------------------------------------------------------------------------------------------------------------------------------------------------------------------------------------------------------------------------------------------------------------------------------------------------------------------------------------------------------------------------------------------------------------------------------------------------------------------------------------------------------------------------------------------------------------|
|    |                                            |             |        | VLAPMRRLAHATRRMAEGDYAARVDVHSGDEIGHLADDFNRLAETLEANQKMRR<br>QLTADISHELRTPLAVLRGELEALEDGVRALTPASLTSLQAEVGTLSKLIDDLIELSL<br>ADVGAALAFHMESIDLADTVCSAAQGFPTRLMDKRIALQLDLPTGPSRDAAIQGGDPQR<br>LRQLMQNLLENTLRYTDAGGTLRIHVHRAGAWWCLDPVQDSAPGVPEAMLPRVDFDR<br>LFRADPSRGRAGQGAGLGLSLCQTIVQTHGGTIDARSPSLGGLWAIARLPAANSSVAD<br>HDPDR                                                                                                                                                                                                                                                                                                                                                                                                                                                                                                                                                                                                                                                                                                                                                                                                                                                                          |
| 13 | periplasmic protein                        | cpxP/ spy   | K06006 | MFAVTPRRSLAAVAAGLLLSCAVAYAQSSAPEASPRPPMAPHGMHPMPGGPGFMGP<br>HHGGLFLHGLKLTEAQRDKVFAIEYAQMPELREQRKAIEHARRDLREMVVSGQYDE<br>ARSRALTDALGRAVARETQLRAQADAKILQVLTPEQRKQISDREAQRVAAMEEEAG<br>PPPQPM                                                                                                                                                                                                                                                                                                                                                                                                                                                                                                                                                                                                                                                                                                                                                                                                                                                                                                                                                                                                       |
| 14 | captular synthesis response regulator      | rcsB        | K07687 | MQAPVRFIAADHDPGVVAAVRHLCRVEGFEVVGEATSADGLLALLGRVHCDVVIT<br>DYAMPASRHGDGIVLLEFLRRHPGVRVVVLTMLETHAVVDRMLRAGIRVIAKAD<br>SPHHILEGVHAALAGRAYLSPRFGPRLDSAHPGHAPDDHGALDRLGKREVLRLMY<br>VGGETVSEIARRLNRSVKTISAQKQKSMRKLRLATEAALDFAAQHGLLGTGR                                                                                                                                                                                                                                                                                                                                                                                                                                                                                                                                                                                                                                                                                                                                                                                                                                                                                                                                                             |
| 15 | histidine kinase                           | rcsC        | K07677 | MPQRLTKTGRYSRRVLYGCTAALSIAIVGAVLLGRGIIDQYGRQVAVFVTSGE<br>VRTEVDGLSARLAQFADLYEGVWNLQNDVVPTRRYAGKLAADRATVTGADLT<br>ATPVTLISSLDRLPADGARLAMALRVLRDVSGAPLMDAQKLGVTLDGFLYTPDATFL<br>AAPALRPADLRSAREQGPQPFIRERIAAVEQRIASSAPEAVRGRRLWYPADETNGH<br>ASVSQILVPMYRDNRVLTIALTLPDAQFTRFFLRKESRRPGFFLLSQTGQSRSLGDL<br>ADLEERRLLDTVLANADWSRQAGAEPTTFYKDGVEFVSRRRAGPDWIAVYAYRWQ<br>DVWSDQLQHEFFAGMVFCVLVLGLLWATAAYFDLRVTRPLLSDAKKLIEAEHFSKAI<br>DTLPIGIGVYSPETDSILLENSAVRMLGNVSNEQRLRFYRVVMHERDAEPVPGARH<br>SFIEVRWERAEGQSSYIGVASSWTRFGGRSAVLLGLVDMNERKANEILLMEAKQTA<br>DEANRAKSMFLAIVGHEIRTPLHGAMGHLELLARSALSLEQREWVDMTSRSFDALLT<br>LVNDLLDSTKLEANALQISPVMPNEVLERCARSFGAIVQGGVAFHCITDPDLDL<br>VVDGDDQRLTQILQNLLSNAKFTERTGITIASRCLKEAPVGRRLDGLGILLHLKRELD<br>AMQSTIFNPLAQADDSISRRFGGTGLGLFLCRNLAHLMGGRISVRSEPGIGSAFRVDL<br>PFAQNTAPAPPPVLTGLSVELLCPVSQWRGMLAERLRRWG<br>ATVRPAEASAAEPLHIRLAVEADGRAWHAADLGTVPLLGTVFVTAKGPLHAHRDGO<br>KIEVSSFTREGLLAALTELTGAARPAETPVSMVDEGLGADLDLVAEDDAVNRTL<br>RHQLAALGCQRVRVAVDGVEALEMWLERRADLVITDLGMPRLDGLLHLKRELD<br>PRARVIATSASVSAEIKADVEQFSSLLQKPVSLGDLRRLRQEMLSRTASPTPAVAEPV<br>RADALDALLRQAFRTEWNERKKSIEQALAGKMDALRRRVHRLQGALMALGADA<br>LVEELRGLQDIYSRADWALIAIRCHQLLAHVDASVG |
| 16 | RNA polymerase sigma-70 factor             | rpoE (σE)   | K03088 | MTIAPEQLDALRPHLLRFAQLQLRDPALEDVADTVLAVLEHPERFAGNASLKTY<br>VIGILKHKIIDAIRSGRREVRVSLLAGGASDETDQRTDEAVFDALFAADGHYLTTPSD<br>WGNPDAAALSRRFEFDILQMCVDRLPPRVGRVFMREWLELETDEICQLEITATNA<br>WELFYARMRLRACLDLHWFNGQAAA                                                                                                                                                                                                                                                                                                                                                                                                                                                                                                                                                                                                                                                                                                                                                                                                                                                                                                                                                                                     |
| 17 | sigma-E factor negative regulatory protein | rseA        | K03597 | MEFWYREGMQAQMQAADAGFAERISALMDGEVAAHEAAAVELAKDGEGAGHW<br>REYQLIGDALRSEDLLGAHSTEAFLGRFSAKLDAEPHLLVPAVAQRAQTEERHRLV<br>RPSWVRRVVPSTAVAAA VAAVSWVVPQLRGPTGSGDASPALVAKAQQGAGAQA<br>VTVSAAENTPMIRDARLDEYLSAHRQSATNGVVVPYLRAVANGAASTQDSSQE                                                                                                                                                                                                                                                                                                                                                                                                                                                                                                                                                                                                                                                                                                                                                                                                                                                                                                                                                              |
| 18 | serine protease                            | degQ (degS) | K04772 | MLRRFWLFFAQAVTVVLAVVFWIATLKPEWLQRGKVAVQSGSPIVALKEVAPLGHS<br>GTTSNSYAEAAKVAMPVAVNIFSSKNAPKRNNPQANADPWFRFFFGDRLPEQRQEP<br>TASLGSGVIVSPEGYILTNNHHVVDGADEIEVALTDGRKANAKVVGTDPEITDLAVLKI<br>SLTNLPAITLGRLENVRVGDVLAIGNPFGVGQTVTMGIVSALGRSHLGINTESIIFQ<br>TDAAINPGNSGGALVDAEENLLGINTAIYRSRGGSLGIGFAIPVSLAKQVMFENISTGS<br>VVRGWIGVEPQDVTPEIAESFGLSRKDGALIAAVVQGGPADRAGLRPGDILINVGES<br>IQDTTALLNSIAQLKPSTEAKVTVSRKGKPVELTIMVGKRPVPVRNVPMPSPEDQEP<br>Q                                                                                                                                                                                                                                                                                                                                                                                                                                                                                                                                                                                                                                                                                                                                                   |
| 19 | recombination protein                      | recA        | K03553 | MEDGKKAASMSAEKQKALAAALAQIEKQFGKGSIMKMGDAEVEPVQVVSTGSLGL<br>DVALGVGGLPRGRVVEIYGPESGKTTLTLQVVAEMQKLGGTCAFIDAHEHALDVTY<br>ADKLGKVPDILLISQPDTEQALEIADALVRSGVDLIVDSVAAVLPKAEIEGEMGD<br>ALPGLQARLMSQALRKLTGTIKRTNCLVIFINQIRMKIGVMFGSPETTTGGNALKFYA<br>SVRLDIRRIGSIKKGDEVVGNETKVKVKNKVAPPFREAIFDILYAGVVSREGEIIDL<br>VEAKVVEKSGAWYSYNGERICQGRDNCREFLRENAELAREIENKVREHLGVTMPMA<br>VTLAEVEED                                                                                                                                                                                                                                                                                                                                                                                                                                                                                                                                                                                                                                                                                                                                                                                                               |
| 20 | recA repressor                             | lexA        | K01356 | MATLTTRQQIYDLIHQTIQRTGFPPTRAEIAAEFGFSSPNAAEEHLRALARKGVIELT<br>PGASRGIRLRAEGGASPHQFSLPSMGLMQLTLPLVGRVAAGSPILAAEHIDRQYQVD<br>PSLFSSRPDFLLKVRGMSMRDAGILDGDLAVQRAAEANGKIVVARLGDDVTVKR<br>FQRKGRQVELIAENPDFEPIHVDLDRDEFQLEGLAVGLIRPAAP                                                                                                                                                                                                                                                                                                                                                                                                                                                                                                                                                                                                                                                                                                                                                                                                                                                                                                                                                                |
| 21 | rna polymerase sigma (sigma-38) factor     | rpoS (σS)   | K03087 | MPRQKAATSANPADETIGAVDGNAPNGRSGRARGAAPASDDVEVVDPLIDEAP<br>AAEPADIADTSDANDSADSEDEEDGEEAAPEEDFRTVLQAEAAADTVQHYNLRIS<br>IKPLLTAEELHFSTLAKAGEFAARQVMIERNLRLVVSIAKGYLNRGVPLLDLIEEGN<br>LGLMHAIEKFDPERGFRFSTYATWWIRQSIERAIMNQARTVRLPVHVIRELNVQLRA<br>KRHLEKSGIDGRDASIEDIAHLLGKTTEEVDVLSNEHTTSLDTPFDLPDGTSLDLFL<br>SDEHGASPDQEVARELSQLMKSWLARLSDKHRYVVERRFGLNHIEPATLEELAAE<br>MGLTRERVRQIQEALVKLRHFASQGVKDAVL                                                                                                                                                                                                                                                                                                                                                                                                                                                                                                                                                                                                                                                                                                                                                                                            |
| 22 | fructose operon transcriptional repressor  | fruR        | K03435 | MTVRKDVAAAAGVSVATVSRALAGGPVSEALRRKRVDAVAASGYRPNLSARRLR<br>SQAQTVGLIVSDIRNPFPTSVSRAVEDAAAYAGLRVILCNSDEDPDKEAMYLRIME<br>EERTVTGVLSPTRRIAESPAPVVLGFPVVLIDRAGPACGVDAVVLDNQAAQALAEH<br>LAQHGYRRIGGLFGRTSSTGAERHAGVAAGLARHGLAIDARFILPTAEAAEAETLAW<br>LASGERPDALVASNAQSLGLVLRAIRRLSLDVPGDIAVAGDFNEPWEITAGPGVTVI<br>EQPVYDIGRLAMTMLQERLAQPELPTRRVLLTGRLVARGSTPQRRM                                                                                                                                                                                                                                                                                                                                                                                                                                                                                                                                                                                                                                                                                                                                                                                                                                       |
| 23 | GTP diphosphokinase                        | spot        | K01139 | MFGPTSQPAAPPRQVVSIAGLTEKLSYLKPADIKLVKEAFHFSDEAHLGQYRQSSEP<br>YITHPVAVAEICAGWKLDVQSIMAALLHDVIEDQGVTKSELAEEKFGPKVAELVDGLT<br>KLDKLEFQSREQAQAESFRKMLLAMARDVRVILVKLADRTHNMRTLDHVPPEKRRR<br>IAGETMEIYAPIAHLRLGLNTTYRELQELSFRIGSPFRYATLEKAVKAARGNRREVVSRI                                                                                                                                                                                                                                                                                                                                                                                                                                                                                                                                                                                                                                                                                                                                                                                                                                                                                                                                              |

|    |                                                     |              |        |                                                                                                                                                                                                                                                                                                                                                                                                                                                                                                                                                           |
|----|-----------------------------------------------------|--------------|--------|-----------------------------------------------------------------------------------------------------------------------------------------------------------------------------------------------------------------------------------------------------------------------------------------------------------------------------------------------------------------------------------------------------------------------------------------------------------------------------------------------------------------------------------------------------------|
|    |                                                     |              |        | LEAAQRALGDAGVSAELTGREKTLYSIYRKMHDKQLSFSQVLDVYGFRVVVETQM<br>HCYMAVGALHGLYKPMMPGKFKDYIAIPKINGYQSVHTTLVGPFGTPVEFQIRTREMN<br>QIAEAGVAAHWMYKQHHDEPDRAQQQAHQWLQSLLDIQSQSGDSQEFLHVKIDL<br>FPDAVYVFTPKGEIRALPRGATALDFAYAVHSDLGNCQVAVKINNALLPLRTELKNG<br>DIVEVVTAPYSKPNPAWLTFVRTGKARAAIRHFLKTAKLDEAIQLGERLLEQALRQL<br>GIDMKAVPAQVWERIVQWTGNGKAREDFADLALGRRVAAVVARRIEIGLQEGGHEG<br>DEALIAAVHAFAGEEAPAVTVSGDEGMAMVFSPPCRPIPGDPIVGYIGKGEGQLQIHVE<br>ECRVAKRLHGKDPEHWIDVMWAEHTTTRAFDVSIKVLVRNTKGILARVAADLTSA<br>ANVAHVSMQEGGGQEATYMTFLIQVHDRVHLADVMRALRRNLDVIRIARDRGGE |
| 24 | ferric uptake<br>regulator                          | fur<br>(ZUR) | K03711 | MNSPAPRDVPTTSHPDAPAAAARARLRGLGSRVTEPRVRVLAALMQGDAPLSHQAV<br>CDALPADAGIDRVTVYRVLDWLVAGGIVHKTAGADRVRFRSLAEHDAAREAHHRA<br>HSHFCTQCGRDFCLETATPPAVPTPALPAGFAADHAELTIKCCADCAARHQTGNA<br>PCPN                                                                                                                                                                                                                                                                                                                                                                    |
| 25 | dna<br>protection<br>during<br>starvation           | Dps          | K04047 | MAKKNGGAAAAAQINIGIAEKDRKKIAEGLSRLLADTYSLYLKTNNFHWNVTPMF<br>NTLHLMFETQYNELWTAVDSSAERIRALGYAPGSYSEFARLSSIPEAKGVPAAEDM<br>IRELVAGHESVTRTARSLFPDVKAADEPTADLLTQRMIDIHEKTAWMLRSLLA                                                                                                                                                                                                                                                                                                                                                                              |
| 26 | assimilatory<br>nitrate<br>respiration<br>regulator | Fnr          | K21563 | MHETRDIGDLLKHSPLFEGLDAEDLATLARDSHQIRLARHDFVFHGRDCADGFYVV<br>AVGTIKLVLPAGAHGHNKVIEFFGPGGEYFGEPPMFLNQPHAADAQALEDSSLIRIGKPTI<br>DAALDIHPTLARRMLTGLSSRLHTLMCDIETVNLQSASQRLIGYLLMLPRKLDRARFP<br>CSKTLVASKLGLAPATLSRVLQQLIRDGLILVEGRDVVIHSAAALQRQLRAG                                                                                                                                                                                                                                                                                                           |
| 27 | anaerobic<br>regulatory<br>protein                  | Fnr          | K01420 | MIPSTLKAQTSADVTRPTPLQLKLVRDATQARQTVSPALSSQCANCMMHWVCIAG<br>AVPSTQQERVDRMVHTWRKVKGGEALFRAGDTFHLYAIRSGSFKTVVSHPNGSSH<br>VTGFQLAGETLGLDGIADRHCTDAIALEDSTVCSMPFHCVEDLCQAIRPLQHRLHQ<br>LLAEEIVRESGLMLLLARLTAEARVATFLLNLSSRMQDRGYSGCFTLRMTREEIGSY<br>LGMQLETVSRALSRFQREGWISVNGKQIELANKAALSEL                                                                                                                                                                                                                                                                    |
| 28 | transcription<br>regulator<br>protein               | H-NS         | K03746 | MATYKDLLSQKAKLEEQLAARQKELAEITAQVRQVVQEYGLTAEDIGLAPKRGGK<br>RAPKAAPVPKYRDPKTGATWTGRGRAPAWIGKNRDKYLIA                                                                                                                                                                                                                                                                                                                                                                                                                                                       |

**Table S2.** Secondary data set for stress responsive enzymes and factors of *R. solanacearum* using KO orthologs derived from STRING results

| Sl. No. | Enzyme/Name                                             | Coded by | KO No. | Quarry Sequence from<br><i>Ralstonia solanacearum</i> strain GMI1000                                                                                                                                                                                                                                                                                                                                                                                                                                                                               |
|---------|---------------------------------------------------------|----------|--------|----------------------------------------------------------------------------------------------------------------------------------------------------------------------------------------------------------------------------------------------------------------------------------------------------------------------------------------------------------------------------------------------------------------------------------------------------------------------------------------------------------------------------------------------------|
| 1       | lipoprotein                                             | nlpD     | K06194 | MNPPSPARAGRLAVAMVSAALLAACASSGNQAPVLDRTSRAGSAPAAPLEPPPPGY<br>YRVKRGDTLYSIALRNGQAPRDLVTWNNIPNPNQIEVDQLIRVVPPNADASATGAVA<br>TPVRPPNTTTPIDAAPAAPTPPVVSSGASAGATDGAIALAWPAHQVIGRFDDKANK<br>GIDIGGKRGDVTAADDGKVIHVGLRGYGNLVIKHNDTFLTAYGNNDKVLVTEQS<br>TVKKGQKIAEMGSTDADRVKLHFEVRRNGKPVDPMRFLPPQ                                                                                                                                                                                                                                                           |
| 2       | serine protease                                         | degQ     | K04772 | MLRRFWLFFAQAVTVVLAVVFIATLKPEWLQRGKAVVQSGSPIVALKEVAPLGHS<br>GTTNSYAEAAKVAMPAVVNIFSSKNAPKRNNPQANADPWFRFFFGDRLPEQRQEP<br>TASLGSGVIVSPEGYILTNHHVVDGADEIEVALTDGRKANAKVVGTDPETDLAVLKI<br>SLTNLPAITLGRLENVRVGDVVLAIKNPFGVGQTVTMGIVSALGRSHLGINTFENFIQ<br>TDAAINPGNSGGALVDAEENLLGINTAIYSRSGSLGIGFAIPVSLAKQVMESIISTGS<br>VVRGWIGVEPQDVTPEIAESFGLSRKDGALIAAVVQGGPADRAGLRPGDILINVNGES<br>IQDTTALLNSIAQLKPSTEAKVTVSRKGKPVELTIMVGKRPVPVRRNVMPSPEDQEP<br>Q                                                                                                        |
| 3       | sigma-E factor negative regulatory protein              | rseB     | K03598 | MRESMSKVWHPVAGAGARKLQAVRRSVFLLLCVSALSVAQAQQPEPMRKEAAS<br>WLTKIHRAALKQNYVGTLYQRGSGMHSTRIQHYTDLFNNEYERVEALDGKQREM<br>LRQNDVVRNLIYEVKLVVTEKQENKDSFPALLATTNGDVLDQYDMRHLPAERVAG<br>MDCEVFQLDPKDGFYAYRIWAERSSGLLIRAQTIGEDGKVLQVAFSQVEVGVPS<br>KQKILAAALKSVTGWNQYEVVSQPTNLAEQGWAITSPIKGFQKIREVRRPLGDIAPAG<br>KSSSGFEVQVVFSDGLAGLSLFIQVSEKRSRREGFISQGATHVMVRRADFWLTVV<br>GEVFPATIKQFGAAVDYKPVSAANAASRPASTP                                                                                                                                                 |
| 4       | DNA repair and recombination protein                    | recX     | K03565 | MALPROPLSLKARALGYLSRREHSRAELRRKLAPHAESVDEVEALLDWLEGENWLS<br>NTRFAESVVHRRASRYGTARLMQELKTHELGDDALGEVKAQLQASEMARAKAVW<br>ERRFRPPADMAERAKQVRFMVARGFSRAVVSRIQGADALLDDGDEPV                                                                                                                                                                                                                                                                                                                                                                              |
| 5       | osmolarity sensor histidine kinase                      | ompR     | K07638 | MRIPRPAALRRLISVFGSLFWRTFMLIALLIAISLGAWFQSFRIREFEPRAQQIAMQIV<br>SVVKLTRAALLYSDPARRRFLLDLVQNEGKIVPREKEDEYRTPQANPYLTQLVQR<br>EIRNRLGQDVTIATAVNDIPGVVVSFQIEGDDYVVAISPDRFEHVPGQLWLWWSIAA<br>LVLSVLGAAFITSRVNQPLKRLADTARAISAGDDPKSLPEGGGTEVAQANHSFNQMV<br>RDLKQLEADRAVMLAGISHDLRTPLTRLRLETEMSPVDDQTRELMVADIEQMDAIIG<br>QFLDYARPSGEMLEAVDLTELVRDTPVYSAHDDIDLTLKLAPEAIARCNRMETQRI<br>LDNLIENARRYGKTHDTGRAEITVSTALQGNEVVLCAVDRGAGVPADQLALLTRPF<br>YRLESARSEAKGAGLGMSIVSRILQRSGGRLTLENRTPPETGLVVSACYARG                                                      |
| 6       | sensor histidine kinase transcription regulator protein | envZ     | K07638 | MRIPRPAALRRLISVFGSLFWRTFMLIALLIAISLGAWFQSFRIREFEPRAQQIAMQIV<br>SVVKLTRAALLYSDPARRRFLLDLVQNEGKIVPREKEDEYRTPQANPYLTQLVQR<br>EIRNRLGQDVTIATAVNDIPGVVVSFQIEGDDYVVAISPDRFEHVPGQLWLWWSIAA<br>LVLSVLGAAFITSRVNQPLKRLADTARAISAGDDPKSLPEGGGTEVAQANHSFNQMV<br>RDLKQLEADRAVMLAGISHDLRTPLTRLRLETEMSPVDDQTRELMVADIEQMDAIIG<br>QFLDYARPSGEMLEAVDLTELVRDTPVYSAHDDIDLTLKLAPEAIARCNRMETQRI<br>LDNLIENARRYGKTHDTGRAEITVSTALQGNEVVLCAVDRGAGVPADQLALLTRPF<br>YRLESARSEAKGAGLGMSIVSRILQRSGGRLTLENRTPPETGLVVSACYARG                                                      |
| 7       | catalase hydroperoxidase hPII oxidoreductase protein    | kata     | K03781 | MSFPSRSLRVSLALAAALTAHAGAVTLTRDNGAPVGDNQNSQTAGPNPVLQDV<br>QLIKLQRFDRERIPERVHARGTGAGHVFAVASKDISDLTRAKVFTPGETPVFVRF<br>SVIHSGHSPETLRDPRGFATKFTYREGNWDLVGNLNPVFFIRDAMKFPDMVHSLKPS<br>PDSNVQDPNRRFFDFSHQPESTHMLTRVYTDYGTPTSIREMDGNSVHAYKFVNAKG<br>EVHYVKFHWKSLQGQKGLSAKEVEAIQKGFNMTDLIANIDKGNYPKWDLYIQ<br>VLKPEQLAKFDFDPLDATKVWPDVPEVKVGTMTLNKNPENVFQETEQAALAPSNLV<br>PGIEPSEDRLQGRIFSADTQLYRVGTNGLQLPVNRPTSAANYNQDGDNLNAGARK<br>GSVNYQPSAHADLSAATVKYSQPLVSGTTQQQRIARTQNFQAGDYRSLTAKEQ<br>ANLVSNLAGDLGQVKDDGVKYTMSYFQKADAGYGRALAQAVKADPARVESLAA<br>KLQD |

**Table S3.** Normalised (10%) pBLAST 2.2.26 score for the SRGs of *R. solanacearum*.

|      | FJAT15252 | FJAT1458 | FJAT1458 | FJAT1463 | FJAT1463 | FJAT15249 | FJAT15252 | FJAT15249 | T78   | EP1   | T60   | FJAT454 | FJAT448 | FJAT448 | SL3882 |
|------|-----------|----------|----------|----------|----------|-----------|-----------|-----------|-------|-------|-------|---------|---------|---------|--------|
| katE | 0         | 0        | 0        | 0        | 0        | 0         | 0         | 0         | 0     | 0     | 0     | 0       | 0       | 0       | 0      |
| katG | 98.71     | 98.71    | 98.71    | 98.71    | 98.71    | 98.71     | 98.71     | 98.71     | 98.82 | 98.39 | 98.82 | 98.71   | 98.71   | 98.71   | 98.82  |
| norB | 0         | 0        | 0        | 0        | 0        | 0         | 0         | 0         | 0     | 0     | 0     | 0       | 0       | 0       | 0      |
| sodB | 81.73     | 81.73    | 81.73    | 81.73    | 81.73    | 81.73     | 81.73     | 81.73     | 81.73 | 81.73 | 81.73 | 81.73   | 81.73   | 81.73   | 81.73  |
| sodC | 86.63     | 86.63    | 86.63    | 86.63    | 86.63    | 86.63     | 86.63     | 86.63     | 86.63 | 87.19 | 86.63 | 86.63   | 86.63   | 86.63   | 86.63  |
| oxyR | 96.11     | 96.11    | 96.11    | 96.11    | 96.11    | 96.11     | 96.11     | 96.11     | 96.11 | 95.65 | 96.11 | 96.11   | 96.11   | 96.11   | 96.11  |
| dksA | 90.32     | 90.32    | 90.32    | 90.32    | 90.32    | 90.32     | 90.32     | 90.32     | 90.32 | 89.61 | 90.32 | 90.32   | 90.32   | 90.32   | 90.32  |
| nsrR | 100       | 100      | 100      | 100      | 100      | 100       | 100       | 100       | 100   | 100   | 100   | 100     | 100     | 100     | 100    |
| dnr  | 0         | 0        | 0        | 0        | 0        | 0         | 0         | 0         | 0     | 0     | 0     | 0       | 0       | 0       | 0      |
| ompR | 92.18     | 92.18    | 92.18    | 92.18    | 92.18    | 92.18     | 92.18     | 92.18     | 92.18 | 92.18 | 92.18 | 92.18   | 92.18   | 92.18   | 92.18  |
| baeR | 35.31     | 35.31    | 35.31    | 35.31    | 35.31    | 35.31     | 35.31     | 35.31     | 35.31 | 35.08 | 35.31 | 35.31   | 35.31   | 35.31   | 35.31  |
| baeS | 0         | 0        | 0        | 0        | 0        | 0         | 0         | 0         | 0     | 0     | 0     | 0       | 0       | 0       | 0      |
| gmK  | 100       | 100      | 100      | 100      | 100      | 100       | 100       | 100       | 99.34 | 99.34 | 99.34 | 99.34   | 99.34   | 99.34   | 99.34  |
| rcsB | 99.32     | 99.32    | 99.32    | 99.32    | 99.32    | 99.32     | 99.32     | 99.32     | 99.32 | 99.54 | 99.32 | 99.32   | 99.32   | 99.32   | 99.32  |
| rcsC | 0         | 0        | 0        | 0        | 0        | 0         | 0         | 0         | 0     | 0     | 0     | 0       | 0       | 0       | 0      |
| rpoE | 90.27     | 90.27    | 90.27    | 90.27    | 90.27    | 90.27     | 90.27     | 90.27     | 90.27 | 90.52 | 90.27 | 90.27   | 90.27   | 90.27   | 90.27  |
| rseA | 60.7      | 60.7     | 60.7     | 60.7     | 60.7     | 60.7      | 60.7      | 60.7      | 60.7  | 60.23 | 60.7  | 60.7    | 60.7    | 60.7    | 60.7   |
| degS | 94.42     | 94.42    | 94.42    | 94.42    | 94.42    | 94.42     | 94.42     | 94.42     | 94.42 | 94.42 | 94.42 | 94.42   | 94.42   | 94.42   | 94.42  |
| recA | 82.15     | 82.15    | 82.15    | 82.15    | 82.15    | 82.15     | 82.15     | 82.15     | 82.15 | 82.15 | 82.15 | 82.15   | 82.15   | 82.15   | 82.15  |
| lexA | 99.77     | 99.77    | 99.77    | 99.77    | 99.77    | 99.77     | 99.77     | 99.77     | 99.77 | 99.77 | 99.77 | 99.77   | 99.77   | 99.77   | 99.77  |
| rpoS | 82        | 82       | 82       | 82       | 82       | 82        | 82        | 82        | 82    | 82    | 82    | 82      | 82      | 82      | 82     |
| fruR | 85.03     | 85.03    | 85.03    | 85.03    | 85.03    | 85.03     | 85.03     | 85.03     | 85.03 | 85.03 | 85.03 | 85.03   | 85.03   | 85.03   | 85.03  |
| spoT | 98.48     | 98.48    | 98.48    | 98.48    | 98.48    | 98.48     | 98.48     | 98.48     | 98.48 | 98.35 | 98.48 | 98.48   | 98.48   | 98.48   | 98.48  |
| fur  | 71.22     | 71.22    | 71.22    | 71.22    | 71.22    | 71.22     | 71.22     | 71.22     | 71.22 | 71.22 | 71.22 | 71.22   | 71.22   | 71.22   | 71.22  |
| dps  | 88.92     | 88.92    | 88.92    | 88.92    | 88.92    | 88.92     | 88.92     | 88.92     | 89.21 | 88.92 | 89.21 | 88.92   | 88.92   | 88.92   | 89.21  |
| fnr  | 0         | 0        | 0        | 0        | 0        | 0         | 0         | 0         | 0     | 0     | 0     | 0       | 0       | 0       | 0      |
| rpoA | 88.87     | 88.87    | 88.87    | 88.87    | 88.87    | 88.87     | 88.87     | 88.87     | 88.87 | 88.87 | 88.87 | 88.87   | 88.87   | 88.87   | 88.87  |
| h-ns | 96.34     | 96.34    | 96.34    | 96.34    | 96.34    | 96.34     | 96.34     | 96.34     | 92.15 | 96.34 | 96.34 | 96.34   | 96.34   | 96.34   | 96.34  |
| katA | 0         | 0        | 0        | 0        | 0        | 0         | 0         | 0         | 0     | 0     | 0     | 0       | 0       | 0       | 0      |
| envZ | 93.26     | 93.26    | 93.26    | 93.26    | 93.26    | 93.26     | 93.26     | 93.26     | 93.26 | 93.26 | 93.26 | 93.26   | 93.26   | 93.26   | 93.26  |
| ompR | 93.26     | 93.26    | 93.26    | 93.26    | 93.26    | 93.26     | 93.26     | 93.26     | 93.26 | 93.26 | 93.26 | 93.26   | 93.26   | 93.26   | 93.26  |
| nlpD | 78.34     | 78.34    | 78.34    | 78.34    | 78.34    | 78.34     | 78.34     | 78.34     | 78.34 | 78.34 | 78.34 | 78.34   | 78.34   | 78.34   | 78.34  |
| degQ | 94.42     | 94.42    | 94.42    | 94.42    | 94.42    | 94.42     | 94.42     | 94.42     | 94.42 | 94.42 | 94.42 | 94.42   | 94.42   | 94.42   | 94.42  |
| recX | 96.21     | 96.21    | 96.21    | 96.21    | 96.21    | 96.21     | 96.21     | 96.21     | 96.21 | 97.16 | 96.21 | 96.21   | 96.21   | 96.21   | 96.21  |
| rseB | 92.84     | 92.84    | 92.84    | 92.84    | 92.84    | 92.84     | 92.84     | 92.84     | 92.84 | 93.24 | 92.84 | 92.84   | 92.84   | 92.84   | 92.84  |

Table S3. (Cont.)

|      | FJAT454 | SEPPX05 | MAFF<br>211471 | MAFF<br>211472 | RS24  | HA4-<br>1 | FJAT91 | FJAT91 | FJAT91 | SL3300 | FJAT15353 | FJAT15353 | FJAT15353 | FJAT1303 | FJAT1303 |
|------|---------|---------|----------------|----------------|-------|-----------|--------|--------|--------|--------|-----------|-----------|-----------|----------|----------|
| katE | 0       | 0       | 0              | 0              | 0     | 0         | 0      | 0      | 0      | 0      | 0         | 0         | 0         | 0        | 0        |
| katG | 98.71   | 98.28   | 98.82          | 98.82          | 98.39 | 98.82     | 98.82  | 98.82  | 98.82  | 98.82  | 98.39     | 98.39     | 98.39     | 98.39    | 98.39    |
| norB | 0       | 0       | 0              | 0              | 0     | 0         | 0      | 0      | 0      | 0      | 0         | 0         | 0         | 0        | 0        |
| sodB | 81.73   | 80.96   | 81.73          | 81.73          | 81.73 | 81.98     | 81.73  | 81.73  | 81.73  | 81.73  | 81.73     | 81.73     | 81.73     | 81.73    | 81.73    |
| sodC | 86.63   | 86.63   | 86.07          | 86.07          | 87.19 | 86.63     | 86.07  | 86.07  | 86.07  | 86.63  | 86.63     | 86.63     | 86.63     | 86.63    | 86.63    |
| oxyR | 96.11   | 96.11   | 96.11          | 96.11          | 95.65 | 96.11     | 96.11  | 96.11  | 96.11  | 96.11  | 96.11     | 96.11     | 96.11     | 96.11    | 96.11    |
| dksA | 90.32   | 90.32   | 90.32          | 90.32          | 90.32 | 90.32     | 90.32  | 90.32  | 90.32  | 90.32  | 90.32     | 90.32     | 90.32     | 90.32    | 90.32    |
| nsrR | 100     | 99.72   | 100            | 100            | 100   | 99.72     | 100    | 100    | 100    | 100    | 99.72     | 99.72     | 99.72     | 100      | 100      |
| dnr  | 0       | 0       | 0              | 0              | 0     | 0         | 0      | 0      | 0      | 0      | 0         | 0         | 0         | 0        | 0        |
| ompR | 92.18   | 92.18   | 92.18          | 92.18          | 92.18 | 92.18     | 92.18  | 92.18  | 92.18  | 92.18  | 92.18     | 92.18     | 92.18     | 92.18    | 92.18    |
| baeR | 35.31   | 35.31   | 35.31          | 35.31          | 35.08 | 35.08     | 35.31  | 35.31  | 35.31  | 35.31  | 35.31     | 35.31     | 35.31     | 35.08    | 35.08    |
| baeS | 0       | 0       | 0              | 0              | 0     | 0         | 0      | 0      | 0      | 0      | 0         | 0         | 0         | 0        | 0        |
| gmK  | 99.34   | 100     | 99.34          | 99.34          | 99.34 | 99.34     | 99.34  | 99.34  | 99.34  | 99.34  | 99.34     | 99.34     | 99.34     | 99.34    | 99.34    |
| rcsB | 99.32   | 98.63   | 99.77          | 99.77          | 98.86 | 99.77     | 99.77  | 99.77  | 99.77  | 99.32  | 99.77     | 99.77     | 99.77     | 99.77    | 99.77    |
| rcsC | 0       | 0       | 0              | 0              | 0     | 0         | 0      | 0      | 0      | 0      | 0         | 0         | 0         | 0        | 0        |
| rpoE | 90.27   | 90.27   | 90.27          | 90.27          | 90.52 | 90.52     | 90.27  | 90.27  | 90.27  | 90.27  | 89.03     | 89.03     | 89.03     | 89.03    | 89.03    |
| rseA | 60.7    | 60      | 60.7           | 60.7           | 60.23 | 60        | 60.7   | 60.7   | 60.7   | 60.7   | 60.23     | 60.23     | 60.23     | 60.23    | 60.23    |
| degS | 94.42   | 94.42   | 94.42          | 94.42          | 94.42 | 94.17     | 94.42  | 94.42  | 94.42  | 94.42  | 94.42     | 94.42     | 94.42     | 94.42    | 94.42    |
| recA | 82.15   | 82.15   | 82.15          | 82.15          | 82.15 | 82.15     | 82.15  | 82.15  | 82.15  | 82.15  | 82.15     | 82.15     | 82.15     | 82.15    | 82.15    |
| lexA | 99.77   | 100.7   | 99.77          | 99.77          | 99.77 | 99.77     | 99.77  | 99.77  | 99.77  | 99.77  | 99.77     | 99.77     | 99.77     | 99.77    | 99.77    |
| rpoS | 82      | 76.08   | 82             | 82             | 82    | 82        | 82     | 82     | 82     | 82     | 82        | 82        | 82        | 82       | 82       |
| fruR | 85.03   | 85.03   | 85.03          | 85.03          | 85.03 | 85.03     | 85.03  | 85.03  | 85.03  | 85.03  | 85.03     | 85.03     | 85.03     | 85.03    | 85.03    |
| spoT | 98.48   | 98.48   | 98.48          | 98.48          | 98.48 | 98.48     | 98.48  | 98.48  | 98.48  | 98.48  | 98.48     | 98.48     | 98.48     | 98.48    | 98.48    |
| fur  | 71.22   | 71.22   | 71.22          | 71.22          | 71.22 | 71.22     | 71.22  | 71.22  | 71.22  | 71.22  | 71.22     | 71.22     | 71.22     | 71.22    | 71.22    |
| dps  | 88.92   | 89.21   | 89.21          | 89.21          | 88.92 | 88.92     | 89.21  | 89.21  | 89.21  | 89.21  | 89.21     | 89.21     | 89.21     | 89.21    | 89.21    |
| fnr  | 0       | 0       | 0              | 0              | 0     | 0         | 0      | 0      | 0      | 0      | 0         | 0         | 0         | 0        | 0        |
| rpoA | 88.87   | 88.87   | 88.87          | 88.87          | 88.87 | 88.87     | 88.87  | 88.87  | 88.87  | 88.87  | 88.87     | 88.87     | 88.87     | 88.87    | 88.87    |
| h-ns | 96.34   | 96.34   | 96.34          | 96.34          | 96.34 | 97.91     | 96.34  | 96.34  | 96.34  | 96.34  | 96.34     | 96.34     | 96.34     | 92.15    | 92.15    |
| katA | 0       | 0       | 0              | 0              | 0     | 0         | 0      | 0      | 0      | 0      | 0         | 0         | 0         | 0        | 0        |
| envZ | 93.26   | 93.04   | 93.26          | 93.26          | 93.26 | 92.93     | 92.93  | 92.93  | 92.93  | 92.93  | 92.93     | 92.93     | 92.93     | 92.93    | 92.93    |
| ompR | 93.26   | 93.04   | 93.26          | 93.26          | 93.26 | 92.93     | 93.26  | 93.26  | 93.26  | 93.26  | 93.26     | 93.26     | 93.26     | 93.26    | 93.26    |
| nlpD | 78.34   | 78.34   | 78.34          | 78.34          | 78.34 | 78.34     | 78.34  | 78.34  | 78.34  | 78.34  | 78.34     | 78.34     | 78.34     | 78.34    | 78.34    |
| degQ | 94.42   | 94.42   | 94.42          | 94.42          | 94.42 | 94.17     | 94.42  | 94.42  | 94.42  | 94.42  | 94.42     | 94.42     | 94.42     | 94.42    | 94.42    |
| recX | 96.21   | 97.16   | 96.21          | 96.21          | 97.16 | 96.21     | 96.21  | 96.21  | 96.21  | 96.21  | 97.16     | 97.16     | 97.16     | 97.16    | 97.16    |
| rseB | 92.84   | 93.37   | 92.84          | 92.84          | 93.24 | 90.19     | 92.84  | 92.84  | 92.84  | 92.84  | 93.24     | 93.24     | 93.24     | 93.24    | 93.24    |

Table S3. (Cont.)

|      | YC40-M | SL3822 | RUN2279 | CQPS-1 | B2    | MAFF<br>301560 | MAFF<br>241647 | 204   | 203   | 202   | FJAT15244 | RSCM  | FJAT15244 | FJAT15244 | SL3755 |
|------|--------|--------|---------|--------|-------|----------------|----------------|-------|-------|-------|-----------|-------|-----------|-----------|--------|
| katE | 0      | 0      | 0       | 0      | 0     | 0              | 0              | 0     | 0     | 0     | 0         | 0     | 0         | 0         | 0      |
| katG | 98.71  | 98.82  | 97.42   | 98.49  | 98.6  | 98.39          | 98.71          | 98.49 | 98.49 | 98.49 | 98.82     | 98.39 | 98.82     | 98.82     | 98.92  |
| norB | 0      | 0      | 0       | 0      | 0     | 0              | 0              | 0     | 0     | 0     | 0         | 0     | 0         | 0         | 0      |
| sodB | 81.73  | 81.73  | 81.98   | 81.73  | 81.73 | 81.73          | 81.73          | 81.73 | 81.73 | 81.73 | 81.73     | 81.73 | 81.73     | 81.73     | 81.73  |
| sodC | 86.63  | 86.63  | 86.07   | 87.19  | 85.52 | 87.19          | 86.63          | 87.19 | 87.19 | 87.19 | 86.07     | 87.19 | 86.07     | 86.07     | 86.63  |
| oxyR | 95.65  | 96.11  | 95.33   | 67.19  | 96.11 | 95.65          | 95.65          | 96.11 | 96.11 | 96.11 | 96.11     | 96.11 | 96.11     | 96.11     | 96.11  |
| dksA | 90.32  | 90.32  | 90.32   | 90.32  | 90.32 | 90.32          | 90.32          | 90.32 | 90.32 | 90.32 | 90.32     | 90.32 | 90.32     | 90.32     | 90.32  |
| nsrR | 99.72  | 100    | 97.44   | 100    | 100   | 100            | 99.72          | 100   | 100   | 100   | 100       | 100   | 100       | 100       | 99.72  |
| dnr  | 0      | 0      | 10.46   | 0      | 10.71 | 0              | 0              | 0     | 0     | 0     | 0         | 0     | 0         | 0         | 0      |
| ompR | 92.18  | 92.18  | 91.77   | 92.18  | 92.18 | 92.18          | 92.18          | 92.18 | 92.18 | 92.18 | 92.18     | 92.18 | 92.18     | 92.18     | 92.18  |
| baeR | 35.08  | 35.31  | 35.08   | 35.08  | 35.31 | 35.08          | 35.08          | 35.08 | 35.08 | 35.08 | 35.08     | 35.31 | 35.08     | 35.08     | 35.08  |
| baeS | 0      | 0      | 0       | 0      | 0     | 0              | 0              | 0     | 0     | 0     | 0         | 0     | 0         | 0         | 0      |
| gmk  | 99.34  | 99.34  | 100     | 100    | 99.34 | 99.34          | 99.34          | 100   | 100   | 100   | 99.34     | 100   | 99.34     | 99.34     | 100    |
| rcsB | 99.77  | 99.32  | 96.13   | 98.18  | 99.32 | 98.86          | 99.77          | 97.49 | 97.49 | 97.49 | 99.77     | 99.77 | 99.77     | 99.77     | 99.77  |
| rcsC | 0      | 0      | 0       | 0      | 0     | 0              | 0              | 0     | 0     | 0     | 0         | 0     | 0         | 0         | 0      |
| rpoE | 90.27  | 90.27  | 87.78   | 88.53  | 89.03 | 90.52          | 90.27          | 88.53 | 88.53 | 88.53 | 89.03     | 90.52 | 89.03     | 89.03     | 89.03  |
| rseA | 60.7   | 60.7   | 58.84   | 60.23  | 60    | 60.23          | 60.7           | 60.23 | 60.23 | 60.23 | 60.23     | 60.23 | 60.23     | 60.23     | 60.23  |
| degS | 94.42  | 94.42  | 93.8    | 94.42  | 94.42 | 94.42          | 94.42          | 94.42 | 94.42 | 94.42 | 94.42     | 94.42 | 94.42     | 94.42     | 94.42  |
| recA | 82.15  | 82.15  | 81.02   | 82.15  | 82.15 | 82.15          | 82.15          | 82.15 | 82.15 | 82.15 | 82.15     | 82.15 | 82.15     | 82.15     | 82.15  |
| lexA | 99.77  | 99.77  | 97.91   | 99.77  | 99.77 | 99.77          | 99.77          | 99.77 | 99.77 | 99.77 | 99.77     | 0     | 99.77     | 99.77     | 99.77  |
| rpoS | 82     | 82     | 80.55   | 82     | 82    | 82             | 82             | 82    | 82    | 82    | 82        | 23.92 | 82        | 82        | 82     |
| fruR | 85.03  | 85.03  | 84.88   | 85.03  | 85.03 | 85.03          | 85.03          | 85.03 | 85.03 | 85.03 | 85.03     | 85.03 | 85.03     | 85.03     | 85.03  |
| spoT | 98.48  | 98.48  | 98.15   | 98.48  | 98.41 | 98.48          | 98.48          | 98.48 | 98.48 | 98.48 | 98.48     | 98.48 | 98.48     | 98.48     | 98.48  |
| fur  | 70.93  | 71.22  | 69.48   | 70.64  | 71.22 | 71.22          | 70.93          | 70.64 | 70.64 | 70.64 | 71.22     | 71.22 | 71.22     | 71.22     | 71.22  |
| dps  | 88.92  | 89.21  | 89.21   | 89.21  | 88.92 | 88.92          | 88.92          | 89.21 | 89.21 | 89.21 | 89.21     | 89.21 | 89.21     | 89.21     | 88.92  |
| fnr  | 0      | 0      | 10.46   | 0      | 10.71 | 0              | 0              | 0     | 0     | 0     | 0         | 0     | 0         | 0         | 0      |
| rpoA | 88.87  | 88.87  | 88.87   | 88.87  | 88.87 | 88.87          | 88.87          | 88.87 | 88.87 | 88.87 | 88.87     | 88.87 | 88.87     | 88.87     | 88.87  |
| h-ns | 96.34  | 96.34  | 96.34   | 90.05  | 92.15 | 96.34          | 96.34          | 95.81 | 95.81 | 95.81 | 96.34     | 91.1  | 96.34     | 96.34     | 96.34  |
| katA | 0      | 0      | 0       | 0      | 0     | 0              | 0              | 0     | 0     | 0     | 0         | 0     | 0         | 0         | 0      |
| envZ | 92.93  | 92.93  | 93.04   | 93.04  | 92.93 | 93.26          | 93.26          | 93.26 | 93.26 | 93.26 | 93.26     | 93.26 | 93.26     | 93.26     | 92.93  |
| ompR | 93.26  | 93.26  | 93.04   | 93.26  | 92.93 | 93.26          | 93.26          | 93.26 | 93.26 | 93.26 | 93.26     | 93.26 | 93.26     | 93.26     | 92.93  |
| nlpD | 78.34  | 78.34  | 78.7    | 78.34  | 78.34 | 78.34          | 78.34          | 78.34 | 78.34 | 78.34 | 78.34     | 0     | 78.34     | 78.34     | 78.34  |
| degQ | 94.42  | 94.42  | 93.8    | 94.42  | 94.42 | 94.42          | 94.42          | 94.42 | 94.42 | 94.42 | 94.42     | 94.42 | 94.42     | 94.42     | 94.42  |
| recX | 97.16  | 96.21  | 95.9    | 97.16  | 95.58 | 97.16          | 97.16          | 97.16 | 97.16 | 97.16 | 97.16     | 97.16 | 97.16     | 97.16     | 97.16  |
| rseB | 92.84  | 92.84  | 93.77   | 93.24  | 90.19 | 93.24          | 92.84          | 93.24 | 93.24 | 93.24 | 93.24     | 93.1  | 93.24     | 93.24     | 92.97  |

Table S3. (Cont.)

|      | YQ    | MAFF<br>241648 | MAFF<br>211479 | MAFF<br>211491 | UW763 | FJ1003 | T117  | 362200 | T42   | SL3730 | SL2729 | RUN2474 | FJAT442 | FJAT442 | FJAT1452 |
|------|-------|----------------|----------------|----------------|-------|--------|-------|--------|-------|--------|--------|---------|---------|---------|----------|
| katE | 0     | 0              | 0              | 0              | 0     | 0      | 0     | 0      | 0     | 0      | 0      | 0       | 0       | 0       | 0        |
| katG | 98.82 | 98.28          | 98.28          | 98.82          | 98.71 | 98.39  | 98.82 | 98.82  | 98.82 | 98.82  | 98.82  | 97.42   | 98.71   | 98.71   | 98.71    |
| norB | 0     | 0              | 0              | 0              | 0     | 0      | 79.56 | 0      | 0     | 0      | 0      | 0       | 0       | 0       | 0        |
| sodB | 81.73 | 81.98          | 81.98          | 81.73          | 81.73 | 81.73  | 81.73 | 81.98  | 81.73 | 81.73  | 81.73  | 80.96   | 81.73   | 81.73   | 81.73    |
| sodC | 86.07 | 87.19          | 87.19          | 86.07          | 86.63 | 87.19  | 86.63 | 86.63  | 86.63 | 86.63  | 86.63  | 86.07   | 86.63   | 86.63   | 86.63    |
| oxyR | 96.11 | 96.11          | 96.11          | 96.11          | 96.11 | 96.11  | 96.11 | 96.11  | 96.11 | 96.11  | 96.11  | 95.33   | 95.65   | 95.65   | 95.65    |
| dksA | 90.32 | 90.32          | 90.32          | 90.32          | 90.32 | 90.32  | 90.32 | 90.32  | 90.32 | 90.32  | 90.32  | 90.32   | 90.32   | 90.32   | 90.32    |
| nsrR | 100   | 100            | 100            | 100            | 99.72 | 100    | 100   | 99.72  | 100   | 100    | 100    | 97.44   | 99.72   | 99.72   | 99.72    |
| dnr  | 0     | 0              | 0              | 0              | 0     | 0      | 11.57 | 0      | 0     | 0      | 0      | 10.46   | 0       | 0       | 0        |
| ompR | 92.18 | 92.18          | 92.18          | 92.18          | 92.18 | 92.18  | 92.18 | 92.18  | 92.18 | 92.18  | 92.18  | 91.77   | 92.18   | 92.18   | 92.18    |
| baeR | 35.31 | 35.31          | 35.31          | 35.31          | 35.76 | 35.08  | 35.31 | 35.08  | 35.31 | 35.31  | 35.31  | 35.08   | 35.08   | 35.08   | 35.08    |
| baeS | 0     | 0              | 0              | 0              | 0     | 0      | 0     | 0      | 0     | 0      | 0      | 0       | 0       | 0       | 0        |
| gmK  | 99.34 | 100            | 100            | 100            | 100   | 99.34  | 99.34 | 99.34  | 99.34 | 99.34  | 99.34  | 100     | 99.34   | 99.34   | 99.34    |
| resB | 99.77 | 98.63          | 98.63          | 98.63          | 99.77 | 99.77  | 99.32 | 99.77  | 99.32 | 98.41  | 99.32  | 96.13   | 99.77   | 99.77   | 99.77    |
| resC | 0     | 0              | 0              | 0              | 0     | 0      | 0     | 0      | 0     | 0      | 0      | 0       | 0       | 0       | 0        |
| rpoE | 90.27 | 90.52          | 90.52          | 90.52          | 90.52 | 89.03  | 90.27 | 90.52  | 89.53 | 89.53  | 89.53  | 87.78   | 99.27   | 99.27   | 99.27    |
| rseA | 60.7  | 60.23          | 60.23          | 60.23          | 60.7  | 60.23  | 60.7  | 60     | 60.7  | 60.7   | 60.7   | 58.84   | 60.7    | 60.7    | 60.7     |
| degS | 94.42 | 94.42          | 94.42          | 94.42          | 94.42 | 94.42  | 71.34 | 94.17  | 94.42 | 94.42  | 94.42  | 93.8    | 94.42   | 94.42   | 94.42    |
| recA | 82.15 | 82.15          | 82.15          | 82.15          | 82.15 | 82.15  | 82.15 | 82.15  | 82.15 | 82.15  | 82.15  | 81.02   | 82.15   | 82.15   | 82.15    |
| lexA | 99.77 | 99.77          | 99.77          | 99.77          | 99.77 | 99.77  | 99.77 | 99.77  | 99.77 | 99.77  | 99.77  | 97.91   | 99.77   | 99.77   | 99.77    |
| rpoS | 82    | 82             | 82             | 82             | 82    | 82     | 82    | 82     | 81.6  | 82     | 82     | 80.55   | 80.55   | 80.55   | 80.55    |
| fruR | 85.03 | 85.03          | 85.03          | 85.03          | 85.03 | 85.03  | 85.03 | 85.03  | 85.03 | 85.03  | 85.03  | 84.88   | 85.03   | 85.03   | 85.03    |
| spoT | 98.48 | 98.48          | 98.48          | 98.48          | 98.48 | 98.48  | 98.48 | 98.48  | 98.48 | 98.48  | 98.48  | 97.09   | 98.48   | 98.48   | 98.48    |
| fur  | 71.22 | 71.22          | 71.22          | 71.22          | 71.22 | 71.22  | 71.22 | 71.22  | 71.22 | 71.22  | 71.22  | 69.77   | 70.93   | 70.93   | 70.93    |
| dps  | 89.21 | 89.21          | 88.92          | 88.92          | 89.21 | 89.21  | 89.21 | 88.92  | 89.21 | 89.21  | 89.21  | 89.21   | 88.92   | 88.92   | 88.92    |
| fnr  | 0     | 0              | 0              | 0              | 0     | 0      | 0     | 0      | 0     | 0      | 0      | 10.46   | 0       | 0       | 0        |
| rpoA | 88.87 | 88.87          | 88.87          | 88.87          | 88.87 | 88.87  | 88.87 | 88.87  | 88.87 | 88.87  | 88.87  | 88.87   | 88.87   | 88.87   | 88.87    |
| h-ns | 96.34 | 98.95          | 98.95          | 98.95          | 100   | 96.34  | 96.34 | 97.91  | 96.34 | 96.34  | 96.34  | 90.58   | 96.34   | 96.34   | 96.34    |
| katA | 0     | 0              | 0              | 0              | 0     | 0      | 39.54 | 0      | 0     | 0      | 0      | 0       | 0       | 0       | 0        |
| envZ | 93.26 | 93.26          | 93.26          | 93.26          | 93.15 | 93.26  | 93.26 | 92.93  | 93.26 | 93.26  | 93.26  | 93.04   | 93.26   | 93.26   | 93.26    |
| ompR | 93.26 | 93.26          | 93.26          | 93.26          | 93.15 | 93.26  | 93.26 | 93.93  | 93.26 | 93.26  | 93.26  | 93.04   | 93.26   | 93.26   | 93.26    |
| nlpD | 78.34 | 78.34          | 78.34          | 78.34          | 78.34 | 78.34  | 78.34 | 78.34  | 78.34 | 78.34  | 78.34  | 78.7    | 78.34   | 78.34   | 78.34    |
| degQ | 94.42 | 94.42          | 94.42          | 94.42          | 94.42 | 94.42  | 94.42 | 94.17  | 94.17 | 94.17  | 94.17  | 93.8    | 94.42   | 94.42   | 94.42    |
| recX | 96.21 | 95.58          | 95.58          | 95.58          | 96.53 | 97.16  | 96.21 | 96.21  | 96.21 | 96.21  | 96.21  | 95.9    | 97.16   | 97.16   | 97.16    |
| rseB | 92.84 | 92.97          | 92.97          | 92.97          | 93.1  | 93.24  | 92.84 | 90.19  | 92.84 | 92.84  | 92.84  | 93.77   | 92.84   | 92.84   | 92.84    |



Table S3. (Cont.)

|      | FJAT1452 | FJAT445 | FJAT 445 | SY1   | MAFF 311693 | SL2330 | FJAT1 5304 | FJAT15 340 | FJAT 1530 4 | FJAT15 340 | FJAT15 304 | FJAT1534 0 | UW386 | Rs-SY1 | FJAT1303 |
|------|----------|---------|----------|-------|-------------|--------|------------|------------|-------------|------------|------------|------------|-------|--------|----------|
| katE | 0        | 0       | 0        | 0     | 0           | 0      | 0          | 0          | 0           | 0          | 0          | 0          | 0     | 0      | 0        |
| katG | 98.71    | 98.71   | 98.71    | 98.82 | 98.28       | 98.92  | 98.39      | 98.39      | 98.39       | 98.39      | 98.39      | 98.39      | 97.53 | 98.39  | 98.39    |
| norB | 0        | 0       | 0        | 0     | 0           | 0      | 0          | 0          | 0           | 0          | 0          | 0          | 0     | 0      | 0        |
| sodB | 81.73    | 81.73   | 81.73    | 81.73 | 81.98       | 81.73  | 81.73      | 81.73      | 81.73       | 81.73      | 81.73      | 81.73      | 81.73 | 81.73  | 81.73    |
| sodC | 86.63    | 86.63   | 86.63    | 86.63 | 87.19       | 86.63  | 86.63      | 86.63      | 86.63       | 86.63      | 86.63      | 86.63      | 86.07 | 86.63  | 86.63    |
| oxyR | 95.65    | 95.65   | 95.65    | 96.11 | 96.11       | 96.11  | 96.11      | 96.11      | 96.11       | 96.11      | 96.11      | 96.11      | 95.65 | 96.11  | 96.11    |
| dksA | 90.32    | 90.32   | 90.32    | 90.32 | 90.32       | 90.32  | 90.32      | 90.32      | 90.32       | 90.32      | 90.32      | 90.32      | 90.32 | 90.32  | 90.32    |
| nsrR | 99.72    | 99.72   | 99.72    | 99.72 | 100         | 99.72  | 100        | 100        | 100         | 100        | 100        | 100        | 97.72 | 100    | 100      |
| dnr  | 0        | 0       | 0        | 0     | 0           | 0      | 0          | 0          | 0           | 0          | 0          | 0          | 0     | 0      | 0        |
| ompR | 92.18    | 92.18   | 92.18    | 92.39 | 92.18       | 92.18  | 92.18      | 92.18      | 92.18       | 92.18      | 92.18      | 92.18      | 92.18 | 92.18  | 92.18    |
| baeR | 35.08    | 35.08   | 35.08    | 35.08 | 35.31       | 35.08  | 35.08      | 35.08      | 35.08       | 35.08      | 35.08      | 35.08      | 32.57 | 35.08  | 35.08    |
| baeS | 0        | 0       | 0        | 0     | 0           | 0      | 0          | 0          | 0           | 0          | 0          | 0          | 0     | 0      | 0        |
| gmk  | 99.34    | 99.34   | 99.34    | 100   | 100         | 100    | 99.34      | 99.34      | 99.34       | 99.34      | 99.34      | 99.34      | 99.56 | 99.34  | 99.34    |
| rcsB | 99.77    | 99.77   | 99.77    | 99.77 | 98.63       | 99.77  | 99.77      | 99.77      | 99.77       | 99.77      | 99.77      | 99.77      | 97.04 | 99.77  | 99.77    |
| rcsC | 0        | 0       | 0        | 0     | 0           | 0      | 0          | 0          | 0           | 0          | 0          | 0          | 0     | 0      | 0        |
| rpoE | 99.27    | 99.27   | 99.27    | 90.52 | 90.52       | 89.03  | 89.03      | 89.03      | 89.03       | 89.03      | 89.03      | 89.03      | 88.53 | 89.03  | 89.03    |
| rseA | 60.7     | 60.7    | 60.7     | 60    | 60.23       | 60.23  | 60.23      | 60.23      | 60.23       | 60.23      | 60.23      | 60.23      | 59.77 | 60.23  | 60.23    |
| degS | 94.42    | 94.42   | 94.42    | 94.17 | 94.42       | 94.42  | 94.42      | 94.42      | 94.42       | 94.42      | 94.42      | 94.42      | 94.42 | 94.42  | 94.42    |
| recA | 82.15    | 82.15   | 82.15    | 82.15 | 82.15       | 82.15  | 82.15      | 82.15      | 82.15       | 82.15      | 82.15      | 82.15      | 82.15 | 82.15  | 82.15    |
| lexA | 99.77    | 99.77   | 99.77    | 99.77 | 99.77       | 99.77  | 99.77      | 99.77      | 99.77       | 99.77      | 99.77      | 99.77      | 95.59 | 99.77  | 99.77    |
| rpoS | 80.55    | 80.55   | 80.55    | 81.47 | 82          | 82     | 82         | 82         | 82          | 82         | 82         | 82         | 81.08 | 82     | 82       |
| fruR | 85.03    | 85.03   | 85.03    | 85.03 | 85.03       | 85.03  | 85.03      | 85.03      | 85.03       | 85.03      | 85.03      | 85.03      | 85.19 | 85.03  | 85.03    |
| spoT | 98.48    | 98.48   | 98.48    | 98.48 | 98.48       | 98.48  | 98.48      | 98.48      | 98.48       | 98.48      | 98.48      | 98.48      | 97.09 | 98.48  | 98.48    |
| fur  | 70.93    | 70.93   | 70.93    | 70.64 | 71.22       | 71.22  | 71.22      | 71.22      | 71.22       | 71.22      | 71.22      | 71.22      | 68.19 | 71.22  | 71.22    |
| dps  | 88.92    | 88.92   | 88.92    | 89.21 | 89.21       | 89.21  | 89.21      | 89.21      | 89.21       | 89.21      | 89.21      | 89.21      | 88.63 | 89.21  | 89.21    |
| fnr  | 0        | 0       | 0        | 0     | 0           | 0      | 0          | 0          | 0           | 0          | 0          | 0          | 0     | 0      | 0        |
| rpoA | 88.87    | 88.87   | 88.87    | 88.87 | 88.87       | 88.87  | 88.87      | 88.87      | 88.87       | 88.87      | 88.87      | 88.87      | 88.87 | 88.87  | 88.87    |
| h-ns | 96.34    | 96.34   | 96.34    | 96.34 | 98.43       | 96.34  | 92.15      | 92.15      | 92.15       | 92.15      | 92.15      | 92.15      | 96.34 | 96.34  | 92.15    |
| katA | 0        | 0       | 0        | 0     | 0           | 0      | 0          | 0          | 0           | 0          | 0          | 0          | 0     | 0      | 0        |
| envZ | 93.26    | 93.26   | 93.26    | 92.93 | 93.26       | 92.93  | 93.26      | 93.26      | 93.26       | 93.26      | 93.26      | 93.26      | 92.83 | 93.26  | 93.26    |
| ompR | 93.26    | 93.26   | 93.26    | 92.93 | 93.26       | 92.93  | 93.26      | 93.26      | 93.26       | 93.26      | 93.26      | 93.26      | 92.83 | 93.26  | 93.26    |
| nlpD | 78.34    | 78.34   | 78.34    | 78.34 | 78.34       | 78.34  | 78.34      | 78.34      | 78.34       | 78.34      | 78.34      | 78.34      | 78.34 | 78.34  | 78.34    |
| degQ | 94.42    | 94.42   | 94.42    | 94.17 | 94.42       | 94.42  | 94.42      | 94.42      | 94.42       | 94.42      | 94.42      | 94.42      | 94.42 | 94.42  | 94.42    |
| recX | 97.16    | 97.16   | 97.16    | 96.21 | 95.58       | 97.16  | 97.16      | 97.16      | 97.16       | 97.16      | 97.16      | 97.16      | 96.85 | 97.16  | 97.16    |
| rseB | 92.84    | 92.84   | 92.84    | 90.19 | 92.97       | 92.97  | 93.24      | 93.24      | 93.24       | 93.24      | 93.24      | 93.24      | 92.84 | 93.24  | 93.24    |

Table S3. (Cont.)

|      | MAFF<br>211491 | Rs5   | T95   | SL2064 | KACC<br>10722 | SL3175 | T98   | T11   | SL23<br>12 | T82   | T101  | T12   | T51   | UW163 | SL3103 |
|------|----------------|-------|-------|--------|---------------|--------|-------|-------|------------|-------|-------|-------|-------|-------|--------|
| katE | 0              | 0     | 39.41 | 39.41  | 39.41         | 39.41  | 39.41 | 39.41 | 39.51      | 39.51 | 39.51 | 39.51 | 39.41 | 0     | 0      |
| katG | 98.28          | 90    | 91.29 | 91.29  | 91.29         | 91.61  | 91.61 | 91.29 | 91.51      | 91.51 | 91.51 | 91.51 | 91.29 | 89.46 | 98.82  |
| norB | 0              | 0     | 79.56 | 79.56  | 79.56         | 79.37  | 79.37 | 0     | 79.83      | 79.83 | 79.83 | 79.83 | 0     | 0     | 0      |
| sodB | 81.98          | 82.99 | 80.2  | 80.2   | 80.2          | 80.2   | 80.2  | 81.73 | 80.2       | 80.2  | 80.2  | 80.2  | 80.2  | 82.99 | 81.73  |
| sodC | 87.19          | 82.45 | 84.68 | 84.68  | 84.68         | 84.96  | 84.96 | 84.68 | 84.96      | 84.96 | 84.96 | 84.96 | 84.68 | 81.34 | 86.63  |
| oxyR | 96.11          | 92.22 | 94.56 | 94.56  | 94.56         | 94.56  | 94.56 | 96.11 | 94.56      | 94.56 | 94.56 | 94.56 | 94.56 | 93.62 | 96.11  |
| dksA | 90.32          | 88.17 | 84.59 | 84.59  | 84.59         | 84.59  | 84.95 | 84.59 | 84.59      | 84.59 | 84.59 | 84.59 | 84.59 | 88.17 | 90.32  |
| nsrR | 100            | 90.03 | 91.17 | 91.17  | 91.17         | 86.04  | 86.04 | 100   | 91.17      | 91.17 | 91.17 | 91.17 | 91.17 | 92.69 | 100    |
| dnr  | 0              | 0     | 11.57 | 11.57  | 11.57         | 11.66  | 11.66 | 0     | 11.57      | 11.57 | 11.57 | 11.57 | 11.57 | 0     | 0      |
| ompR | 92.18          | 92.18 | 92.18 | 92.18  | 92.18         | 92.18  | 92.18 | 92.18 | 92.18      | 92.18 | 92.18 | 92.39 | 92.18 | 92.39 | 92.18  |
| baeR | 35.31          | 35.54 | 35.31 | 35.31  | 35.31         | 35.31  | 35.31 | 35.31 | 35.31      | 35.31 | 35.31 | 35.31 | 35.31 | 35.54 | 35.31  |
| baeS | 0              | 0     | 0     | 0      | 0             | 0      | 0     | 0     | 0          | 0     | 0     | 0     | 0     | 0     | 0      |
| gmK  | 100            | 99.56 | 98.25 | 98.25  | 98.25         | 98.25  | 98.25 | 94.09 | 98.25      | 98.25 | 98.25 | 98.25 | 98.25 | 99.78 | 99.34  |
| rcsB | 98.63          | 81.32 | 89.29 | 89.29  | 89.29         | 88.84  | 88.84 | 68.11 | 89.75      | 89.75 | 89.75 | 89.75 | 89.29 | 81.32 | 99.77  |
| rcsC | 0              | 0     | 0     | 0      | 0             | 0      | 0     | 0     | 0          | 0     | 0     | 0     | 0     | 0     | 0      |
| rpoE | 90.52          | 84.04 | 85.04 | 85.04  | 85.04         | 85.04  | 85.04 | 90.27 | 85.04      | 85.04 | 85.04 | 85.04 | 85.04 | 84.29 | 90.27  |
| rseA | 60.23          | 57.91 | 56.51 | 56.51  | 56.51         | 56.05  | 56.05 | 27.67 | 56.51      | 56.51 | 56.51 | 56.51 | 56.51 | 57.91 | 60.7   |
| degS | 94.42          | 91.44 | 91.19 | 91.19  | 91.19         | 90.94  | 90.94 | 94.42 | 90.94      | 63.77 | 63.77 | 63.77 | 91.19 | 91.69 | 94.42  |
| recA | 82.15          | 81.16 | 78.61 | 78.61  | 78.61         | 78.47  | 78.47 | 82.15 | 78.61      | 78.61 | 78.61 | 78.61 | 78.61 | 78.61 | 82.15  |
| lexA | 99.77          | 96.52 | 93.97 | 93.97  | 93.97         | 93.97  | 93.97 | 51.74 | 93.97      | 93.97 | 93.97 | 93.97 | 93.97 | 96.29 | 99.77  |
| rpoS | 82             | 80.29 | 81.21 | 81.21  | 81.21         | 81.21  | 81.21 | 81.21 | 81.21      | 81.21 | 81.21 | 81.21 | 81.21 | 79.76 | 82     |
| fruR | 85.03          | 85.95 | 84.41 | 84.41  | 84.41         | 84.1   | 84.1  | 85.03 | 84.41      | 84.41 | 84.41 | 84.41 | 84.41 | 83.8  | 85.03  |
| spoT | 98.48          | 95.24 | 95.38 | 95.38  | 95.38         | 96.3   | 96.3  | 95.38 | 95.24      | 95.24 | 95.24 | 95.24 | 95.38 | 95.9  | 98.41  |
| fur  | 71.22          | 66.86 | 68.6  | 68.6   | 68.6          | 69.19  | 69.19 | 68.6  | 68.6       | 68.6  | 68.6  | 68.6  | 68.6  | 68.02 | 71.22  |
| dps  | 89.21          | 89.21 | 89.21 | 89.21  | 89.21         | 89.21  | 89.21 | 89.21 | 89.21      | 89.21 | 89.21 | 89.21 | 89.21 | 89.21 | 88.63  |
| fnr  | 0              | 0     | 11.57 | 11.57  | 11.57         | 11.66  | 11.66 | 11.57 | 11.57      | 11.57 | 11.57 | 11.57 | 11.57 | 0     | 0      |
| rpoA | 88.87          | 88.72 | 88.57 | 88.57  | 88.57         | 88.57  | 88.57 | 88.87 | 88.57      | 88.57 | 88.57 | 88.57 | 88.57 | 88.57 | 88.87  |
| h-ns | 98.95          | 90.58 | 96.34 | 96.34  | 96.34         | 87.43  | 87.43 | 67.02 | 72.77      | 72.77 | 72.77 | 72.77 | 13.93 | 91.1  | 13.51  |
| katA | 0              | 0     | 39.54 | 39.54  | 39.54         | 39.54  | 39.54 | 0     | 39.64      | 39.64 | 39.64 | 39.64 | 39.54 | 0     | 0      |
| envZ | 93.26          | 90.54 | 91.09 | 91.09  | 91.09         | 90.76  | 90.76 | 93.26 | 83.04      | 91.09 | 91.09 | 83.04 | 91.09 | 89.89 | 93.26  |
| ompR | 93.26          | 90.54 | 91.09 | 91.09  | 91.09         | 90.76  | 90.76 | 93.26 | 83.04      | 91.09 | 91.09 | 83.04 | 91.09 | 89.89 | 93.26  |
| nlpD | 78.34          | 74.91 | 75.09 | 75.09  | 75.09         | 75.09  | 75.09 | 75.09 | 75.09      | 75.09 | 75.09 | 75.09 | 75.09 | 75.09 | 78.34  |
| degQ | 94.42          | 91.44 | 91.19 | 91.19  | 91.19         | 90.94  | 90.94 | 73.82 | 90.94      | 63.77 | 63.77 | 63.77 | 91.19 | 91.69 | 94.42  |
| recX | 95.58          | 91.8  | 94.01 | 94.01  | 94.01         | 94.95  | 94.95 | 94.01 | 94.64      | 94.64 | 94.64 | 94.64 | 94.01 | 92.43 | 97.16  |
| rseB | 92.97          | 90.98 | 92.57 | 92.57  | 92.57         | 92.57  | 92.57 | 92.57 | 92.31      | 92.31 | 92.31 | 92.31 | 92.57 | 91.91 | 92.84  |

Table S3. (Cont.)

|      | CIAT_078 | IBSBF<br>2571 | KACC107<br>09 | IBSBF15<br>03 | UY031 | RS 488 | RS<br>489 | GMI10<br>00 | FJAT-<br>1458 | FJAT-<br>91 | PSI07 | OE1-1 | Po82  | RS10  | YC45  |
|------|----------|---------------|---------------|---------------|-------|--------|-----------|-------------|---------------|-------------|-------|-------|-------|-------|-------|
| katE | 0        | 0             | 0             | 0             | 0     | 0      | 0         | 0           | 0             | 0           | 39.41 | 0     | 0     | 0     | 0     |
| katG | 89.46    | 89.46         | 98.82         | 89.46         | 89.57 | 89.57  | 89.14     | 99.89       | 98.71         | 98.82       | 91.94 | 98.39 | 89.46 | 98.49 | 98.28 |
| norB | 0        | 0             | 0             | 0             | 0     | 0      | 0         | 0           | 0             | 0           | 79.37 | 0     | 0     | 0     | 0     |
| sodB | 82.99    | 82.23         | 81.73         | 82.99         | 82.99 | 82.99  | 82.99     | 81.73       | 81.73         | 81.73       | 80.2  | 81.73 | 82.99 | 81.98 | 81.98 |
| sodC | 81.34    | 81.34         | 86.63         | 81.34         | 83.57 | 83.57  | 84.12     | 87.74       | 86.63         | 86.07       | 84.96 | 87.19 | 81.34 | 87.19 | 87.19 |
| oxyR | 93.62    | 93.62         | 96.11         | 93.62         | 93    | 93     | 92.22     | 96.11       | 96.11         | 96.11       | 94.56 | 95.65 | 93.62 | 96.11 | 96.11 |
| dksA | 87.81    | 88.17         | 90.32         | 88.17         | 88.17 | 88.17  | 88.17     | 90.32       | 90.32         | 90.32       | 84.95 | 90.32 | 88.17 | 90.32 | 90.32 |
| nsrR | 92.59    | 92.59         | 99.43         | 92.59         | 91.17 | 91.17  | 82.34     | 100         | 100           | 100         | 86.04 | 100   | 92.59 | 100   | 100   |
| dnr  | 0        | 0             | 0             | 0             | 0     | 0      | 0         | 0           | 0             | 0           | 11.66 | 0     | 0     | 0     | 0     |
| ompR | 92.39    | 92.39         | 92.18         | 92.39         | 92.39 | 92.39  | 92.18     | 92.18       | 92.18         | 92.18       | 92.18 | 92.18 | 92.39 | 91.36 | 92.18 |
| baeR | 35.54    | 35.76         | 35.31         | 35.54         | 35.31 | 35.31  | 35.08     | 35.31       | 35.31         | 35.31       | 35.31 | 35.08 | 35.54 | 35.31 | 32.12 |
| baeS | 0        | 0             | 0             | 0             | 0     | 0      | 0         | 0           | 0             | 0           | 0     | 0     | 0     | 0     | 0     |
| gmk  | 99.78    | 99.34         | 99.34         | 98.78         | 99.34 | 99.34  | 99.56     | 100         | 100           | 99.34       | 98.03 | 99.34 | 99.78 | 100   | 100   |
| rcsB | 81.55    | 81.32         | 99.77         | 81.32         | 82.69 | 82.69  | 80.18     | 99.77       | 99.32         | 99.77       | 88.84 | 98.86 | 81.32 | 98.41 | 27.56 |
| rcsC | 0        | 0             | 0             | 0             | 0     | 0      | 0         | 0           | 0             | 0           | 0     | 0     | 0     | 0     | 0     |
| rpoE | 84.29    | 84.29         | 90.27         | 84.29         | 84.54 | 84.54  | 83.29     | 90.52       | 90.27         | 90.27       | 85.04 | 90.52 | 84.29 | 90.52 | 90.52 |
| rseA | 57.91    | 57.91         | 60.7          | 57.91         | 57.67 | 57.67  | 57.67     | 60.7        | 60.7          | 60.7        | 56.05 | 60.23 | 57.91 | 60.23 | 60.23 |
| degS | 91.69    | 91.69         | 94.42         | 91.69         | 91.56 | 91.32  | 91.56     | 94.42       | 94.42         | 94.42       | 90.94 | 94.42 | 91.69 | 94.42 | 94.42 |
| recA | 78.61    | 51.98         | 82.15         | 78.61         | 81.16 | 81.16  | 80.74     | 82.15       | 82.15         | 82.15       | 78.47 | 82.15 | 78.61 | 78.61 | 82.15 |
| lexA | 96.29    | 96.29         | 99.77         | 96.29         | 96.29 | 96.29  | 96.52     | 100.46      | 99.77         | 99.77       | 93.97 | 99.77 | 96.29 | 99.77 | 99.77 |
| rpoS | 73.32    | 79.76         | 82            | 79.76         | 79.89 | 79.89  | 80.16     | 82          | 82            | 82          | 81.21 | 82    | 79.76 | 82    | 81.47 |
| fruR | 83.64    | 83.8          | 85.03         | 83.8          | 83.49 | 83.49  | 83.49     | 85.03       | 85.03         | 85.03       | 84.26 | 85.03 | 83.8  | 85.03 | 85.03 |
| spoT | 64.27    | 95.77         | 98.41         | 95.9          | 96.17 | 96.17  | 95.44     | 98.61       | 98.48         | 98.48       | 96.3  | 98.48 | 95.77 | 98.48 | 98.48 |
| fur  | 68.02    | 68.02         | 71.22         | 68.02         | 67.73 | 67.73  | 67.15     | 71.22       | 71.22         | 71.22       | 69.19 | 71.22 | 68.02 | 71.22 | 71.22 |
| dps  | 89.21    | 89.21         | 89.21         | 89.21         | 88.63 | 88.63  | 88.92     | 89.21       | 88.92         | 89.21       | 89.21 | 88.92 | 89.21 | 89.21 | 89.21 |
| fnr  | 0        | 0             | 0             | 0             | 0     | 0      | 0         | 0           | 0             | 0           | 11.66 | 0     | 0     | 0     | 0     |
| rpoA | 88.57    | 88.57         | 88.87         | 88.57         | 88.72 | 88.72  | 88.72     | 88.87       | 88.87         | 88.87       | 88.57 | 88.87 | 88.57 | 88.87 | 88.57 |
| h-ns | 93.19    | 92.15         | 89.01         | 92.15         | 13.93 | 13.93  | 13.93     | 100         | 96.34         | 96.34       | 95.81 | 96.34 | 82.15 | 97.91 | 98.95 |
| katA | 0        | 0             | 0             | 0             | 0     | 0      | 0         | 0           | 0             | 0           | 39.54 | 0     | 0     | 0     | 0     |
| envZ | 89.89    | 89.89         | 93.26         | 89.89         | 90.54 | 90.54  | 90.22     | 93.15       | 93.26         | 93.26       | 90.54 | 93.26 | 89.89 | 93.15 | 93.26 |
| ompR | 89.89    | 89.89         | 93.26         | 89.89         | 90.54 | 90.54  | 90.22     | 93.15       | 93.26         | 93.26       | 90.54 | 93.26 | 89.89 | 93.15 | 93.26 |
| nlpD | 75.09    | 75.09         | 78.34         | 75.09         | 75.09 | 75.09  | 75.09     | 78.34       | 78.34         | 78.34       | 75.09 | 78.34 | 75.09 | 78.34 | 78.34 |
| degQ | 91.69    | 91.69         | 94.42         | 91.69         | 91.56 | 91.32  | 91.56     | 94.42       | 94.42         | 94.42       | 90.94 | 94.42 | 91.69 | 94.42 | 94.42 |
| recX | 92.43    | 93.38         | 97.16         | 91.48         | 93.06 | 92.74  | 90.85     | 96.53       | 97.16         | 97.16       | 94.95 | 97.16 | 92.43 | 97.16 | 95.58 |
| rseB | 91.91    | 91.91         | 92.84         | 91.91         | 91.64 | 91.64  | 90.85     | 93.37       | 93.24         | 93.24       | 92.57 | 93.24 | 91.91 | 93.37 | 92.97 |

**Table S3. (Cont.)**

|             | <b>T25</b> | <b>T110</b> | <b>SL3022</b> | <b>CFBP<br/>8695</b> | <b>CFBP<br/>8697</b> |
|-------------|------------|-------------|---------------|----------------------|----------------------|
| <b>katE</b> | 0          | 0           | 39.51         | 0                    | 0                    |
| <b>katG</b> | 98.92      | 59.14       | 54.52         | 86.27                | 85.27                |
| <b>norB</b> | 0          | 0           | 79.63         | 0                    | 0                    |
| <b>sodB</b> | 81.73      | 80.46       | 80.2          | 82.99                | 81.98                |
| <b>sodC</b> | 86.63      | 86.63       | 84.68         | 83.57                | 81.34                |
| <b>oxyR</b> | 67.19      | 96.11       | 94.56         | 93                   | 93                   |
| <b>dksA</b> | 90.32      | 90.32       | 84.59         | 88.17                | 88.17                |
| <b>nsrR</b> | 100        | 99.72       | 91.17         | 91.17                | 91.17                |
| <b>dnr</b>  | 0          | 0           | 11.57         | 0                    | 0                    |
| <b>ompR</b> | 92.18      | 90.74       | 92.18         | 92.39                | 92.39                |
| <b>baeR</b> | 35.08      | 26.65       | 35.31         | 35.31                | 35.31                |
| <b>baeS</b> | 0          | 0           | 0             | 0                    | 0                    |
| <b>gmk</b>  | 100        | 94.09       | 98.25         | 99.34                | 99.34                |
| <b>rcsB</b> | 99.77      | 68.11       | 89.75         | 82.69                | 82.92                |
| <b>rcsC</b> | 0          | 0           | 0             | 0                    | 0                    |
| <b>rpoE</b> | 90.27      | 89.03       | 85.04         | 84.54                | 84.54                |
| <b>rseA</b> | 60.23      | 27.67       | 37.44         | 57.67                | 57.91                |
| <b>degS</b> | 94.42      | 73.82       | 91.32         | 91.56                | 91.56                |
| <b>recA</b> | 82.15      | 82.15       | 78.61         | 81.16                | 81.16                |
| <b>lexA</b> | 99.77      | 51.74       | 93.97         | 96.29                | 96.29                |
| <b>rpoS</b> | 82         | 82          | 81.21         | 78.98                | 79.24                |
| <b>fruR</b> | 85.03      | 85.03       | 84.41         | 83.49                | 83.95                |
| <b>spoT</b> | 98.48      | 98.48       | 95.38         | 96.17                | 96.17                |
| <b>fur</b>  | 71.22      | 71.22       | 68.6          | 67.73                | 67.73                |
| <b>dps</b>  | 48.98      | 88.63       | 89.21         | 88.63                | 89.21                |
| <b>fnr</b>  | 0          | 0           | 11.57         | 0                    | 0                    |
| <b>rpoA</b> | 88.87      | 88.87       | 88.57         | 88.72                | 88.72                |
| <b>h-ns</b> | 96.34      | 96.34       | 66.49         | 13.93                | 13.93                |
| <b>katA</b> | 0          | 0           | 0             | 0                    | 0                    |
| <b>envZ</b> | 92.93      | 92.93       | 91.09         | 90.54                | 90.43                |
| <b>ompR</b> | 92.93      | 92.93       | 91.09         | 90.54                | 90.43                |
| <b>nlpD</b> | 78.34      | 73.83       | 75.09         | 75.09                | 75.09                |
| <b>degQ</b> | 94.42      | 73.82       | 91.32         | 91.56                | 91.56                |
| <b>recX</b> | 97.16      | 35.65       | 94.64         | 93.06                | 93.06                |
| <b>rseB</b> | 90.98      | 49.34       | 65.92         | 91.64                | 92.18                |

**Table S4.** Bacterial secretion systems of *R. solanacearum*

| Sl. No. | Secretion system | Gene                 | KO No. |
|---------|------------------|----------------------|--------|
| 1       | Tat              | TatA/ TatA/E         | K00832 |
| 2       | T1SS             | LipA/LipC            | K01046 |
| 3       | T1SS             | CyaB                 | K01768 |
| 4       | T5SS             | AspA                 | K01744 |
| 5       | T4SS             | Alr                  | K01775 |
| 6       | T1SS             | HlyD                 | K01993 |
| 7       | T1SS             | HlyD                 | K02005 |
| 8       | T1SS             | HlyD                 | K02022 |
| 9       | T1SS             | ABC transporter      | K02056 |
| 10      | T1SS             | ABC transporter      | K02057 |
| 11      | T1SS             | ABC transporter      | K02058 |
| 12      | Tad              | Flp/ Fap/ PilA/ CpaB | K02279 |
| 13      | T3SS             | CpaC/RcpA            | K02280 |
| 14      | T4P              | PilV/ CpaD           | K02281 |
| 15      | Tad              | TadZ/CpaE            | K02282 |
| 16      | Tad              | TadA/CpaF            | K02283 |
| 17      | T4SS             | Alr                  | K02314 |
| 18      | Flg              | FlGB                 | K02387 |
| 19      | Flg              | FlGC                 | K02388 |
| 20      | T3SS             | FlhB                 | K02401 |
| 21      | Flg              | FliE                 | K02408 |
| 22      | T3SS             | FliH                 | K02411 |
| 23      | T2SS             | GspN/XcpP            | K02452 |
| 24      | T2SS             | GspD                 | K02453 |
| 25      | T2SS             | GspE/HxcR/XcpR/PilB  | K02454 |
| 26      | T2SS             | GspF/PilC/XcpS       | K02455 |
| 27      | T2SS             | GspG/XcpT            | K02456 |
| 28      | T2SS             | GspH/XcpU            | K02457 |
| 29      | T2SS             | GspI/XcpV            | K02458 |
| 30      | T2SS             | GspJ/XcpW            | K02459 |
| 31      | T2SS             | GspK/XcpX            | K02460 |
| 32      | T2SS             | GspL/XcpY            | K02461 |
| 33      | T2SS             | GspM/XcpZ            | K02462 |
| 34      | T2SS             | GspN                 | K02463 |
| 35      | T4P              | PilA/Flp             | K02650 |
| 36      | T4P              | PilA/Flp             | K02651 |
| 37      | T4P              | PilB/ GspE           | K02652 |
| 38      | T2SS             | GspF/PilC/XcpS       | K02653 |
| 39      | T2SS             | GspO                 | K02654 |
| 40      | T4P              | PilN                 | K02663 |
| 41      | T4P              | PilT                 | K02669 |
| 42      | T4P              | PilU                 | K02670 |
| 43      | T9SS             | SprT                 | K02742 |
| 44      | Sec-SRP          | SecA                 | K03070 |

|    |         |                          |        |
|----|---------|--------------------------|--------|
| 45 | Sec-SRP | SecB                     | K03071 |
| 46 | Sec-SRP | SecD                     | K03072 |
| 47 | Sec-SRP | SecE                     | K03073 |
| 48 | Sec-SRP | SecF                     | K03074 |
| 49 | Sec-SRP | SecG                     | K03075 |
| 50 | Sec-SRP | SecY                     | K03076 |
| 51 | T5SS    | LepB/IepB                | K03100 |
| 52 | Sec-SRP | Ffh/Srp54                | K03106 |
| 53 | Sec-SRP | FtsY                     | K03110 |
| 54 | T2SS    | DamX                     | K03112 |
| 55 | Tat     | Tat A                    | K03116 |
| 56 | Tat     | TatB                     | K03117 |
| 57 | Tat     | TatC                     | K03118 |
| 58 | T4SS    | VirB1/ AvhB1             | K03194 |
| 59 | T4SS    | VirB10/ AvhB10           | K03195 |
| 60 | T4SS    | VirB11/ AvhB11           | K03196 |
| 61 | T4SS    | VirB2/ AvhB2             | K03197 |
| 62 | T4SS    | VirB3/ AvhB3             | K03198 |
| 63 | T4SS    | VirB4/ AvhB4             | K03199 |
| 64 | T4SS    | VirB5/ AvhB5             | K03200 |
| 65 | T4SS    | VirB6/ AvhB6             | K03201 |
| 66 | T4SS    | VirB7/ AvhB7             | K03202 |
| 67 | T4SS    | VirB8/ AvhB8             | K03203 |
| 68 | T4SS    | VirB9/ AvhB9             | K03204 |
| 69 | Sec-SRP | YajC                     | K03210 |
| 70 | Sec-SRP | YidC/Oxa1                | K03217 |
| 71 | T3SS    | PscC/YscC/EscC/HrcC      | K03219 |
| 72 | T3SS    | PscD                     | K03220 |
| 73 | T3SS    | PscF                     | K03221 |
| 74 | T3SS    | PscJ/YscJ/EscJ/HrcJ      | K03222 |
| 75 | T3SS    | PscL                     | K03223 |
| 76 | T3SS    | PscN/YscN/EscN/HrcN/FilI | K03224 |
| 77 | T3SS    | PscQ/RhcQ                | K03225 |
| 78 | T3SS    | PscR/YscR/EscR/HcrN      | K03226 |
| 79 | T3SS    | YscS/EscS/HcrS           | K03227 |
| 80 | T3SS    | PscT/YscT/EscT/HcrT      | K03228 |
| 81 | T3SS    | PscU/YscU/EscU/HcrU      | K03229 |
| 82 | T3SS    | PscV/RhcV/PcrD           | K03230 |
| 83 | T4SS    | TraG/ VirD4              | K03250 |
| 84 | Tat     | TatD/MttC                | K03424 |
| 85 | T1SS    | HlyD                     | K03543 |
| 86 | T5SS    | LepA                     | K03596 |
| 87 | T5SS    | SspA                     | K03599 |
| 88 | T5SS    | SspB                     | K03600 |
| 89 | T4SS    | MobB                     | K03753 |
| 90 | T3SS    | PscB                     | K04049 |
| 91 | T3SS    | PscE                     | K04050 |
| 92 | T3SS    | PscG                     | K04051 |

|     |      |                     |        |
|-----|------|---------------------|--------|
| 93  | T3SS | PscH                | K04052 |
| 94  | T3SS | PscI                | K04053 |
| 95  | T3SS | PscK                | K04054 |
| 96  | T3SS | PspO                | K04056 |
| 97  | T3SS | PscP                | K04057 |
| 98  | T3SS | PscW/PopN           | K04058 |
| 99  | T3SS | PscX                | K04059 |
| 100 | T3SS | PscY                | K04060 |
| 101 | T3SS | FlhB                | K04061 |
| 102 | T6SS | ImpA/ OstA/ LptA    | K04744 |
| 103 | T1SS | HlyB/ CyaB/ MsbA    | K06147 |
| 104 | T1SS | HlyB/ CyaB/ MsbA    | K06148 |
| 105 | T4SS | TraR/DksA/DnaK      | K06204 |
| 106 | Tat  | TatE                | K06886 |
| 107 | T6SS | HcpA                | K07126 |
| 108 | T4SS | TrbL                | K07344 |
| 109 | T5SS | AlpA                | K07733 |
| 110 | T1SS | HlyD                | K07798 |
| 111 | T6SS | ImpA/ OstA/ LptA    | K09774 |
| 112 | T1SS | HlyD                | K11003 |
| 113 | T1SS | HlyB/ CyaB/ MsbA    | K11004 |
| 114 | T1SS | MsbA                | K11085 |
| 115 | T6SS | ImpM/TssM           | K11890 |
| 116 | T6SS | ImpL/TssL           | K11891 |
| 117 | T6SS | ImpK/TssK/DotU      | K11892 |
| 118 | T6SS | ImpJ/TssJ           | K11893 |
| 119 | T6SS | ImpI/TssI           | K11894 |
| 120 | T6SS | ImpH/TssH           | K11895 |
| 121 | T6SS | ImpG/TssG           | K11896 |
| 122 | T6SS | ImpF/TssF           | K11897 |
| 123 | T6SS | ImpC/TssC           | K11900 |
| 124 | T6SS | ImpB/TssB           | K11901 |
| 125 | T6SS | HcpA                | K11902 |
| 126 | T6SS | Hcp                 | K11903 |
| 127 | T6SS | ImpA/VgrG/VasJ/TssA | K11904 |
| 128 | T6SS | VasG                | K11907 |
| 129 | T6SS | ImpA/VgrG/VasJ/TssA | K11910 |
| 130 | T1SS | TolC                | K12340 |
| 131 | Tad  | TadB                | K12510 |
| 132 | Tad  | TadC                | K12511 |
| 133 | T1SS | AprD/HasD           | K12536 |
| 134 | T1SS | AprE                | K12537 |
| 135 | T1SS | AprF                | K12538 |
| 136 | T1SS | HlyD                | K12542 |
| 137 | T1SS | TolC                | K12543 |
| 138 | T1SS | AprA/HasA           | K12545 |
| 139 | T4SS | Tral/LasI           | K13060 |
| 140 | T5SS | IscA                | K13628 |

|     |      |            |        |
|-----|------|------------|--------|
| 141 | T1SS | HlyD       | K15549 |
| 142 | T1SS | HlyD       | K15727 |
| 143 | T1SS | HlyD       | K18901 |
| 144 | T4SS | TraR/ DksA | K19732 |
| 145 | T4SS | TrbJ       | K20266 |
| 146 | T4SS | TrbB       | K20527 |
| 147 | T4SS | TrbC       | K20528 |
| 148 | T4SS | TrbD       | K20529 |
| 149 | T4SS | TrbE       | K20530 |
| 150 | T4SS | TrbF       | K20531 |
| 151 | T4SS | TrbG       | K20532 |
| 152 | T4SS | TrbI       | K20533 |
| 153 | T3SS | RetS       | K20972 |
| 154 | T1SS | HlyD       | K21136 |



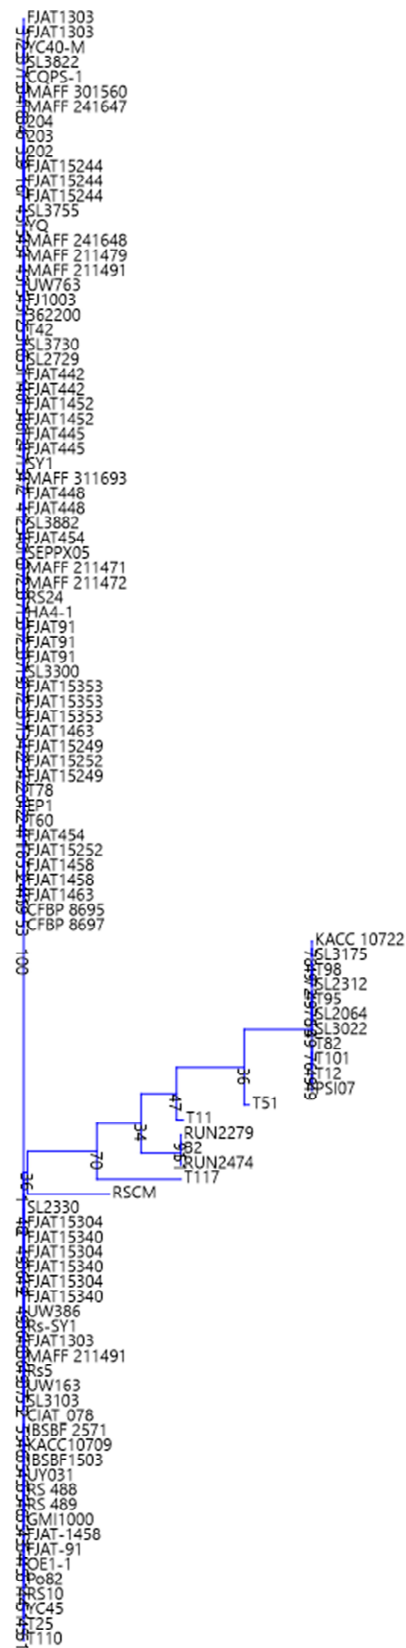

**Figure S1.** Cluster dendrogram based on distribution of stress responsive genes within *R. solanaceum* species complex.
